# Supplementary material for: Divergent synthesis of prenylated carbazole alkaloid (+)-S-mahanimbine led to the discovery of a notch activator
Source: Royal Society of Chemistry journal article supplement (doi:10.1039/c6ra16531a), 2016-01-01

## SUPPORTING INFORMATION

### **Divergent Synthesis of prenylated carbazole alkaloids (+)-S-Mahanimbine led to the discovery of Notch activator**

Yedukondalu Nalli,<sup>a,b</sup> Gaurav Gupta,<sup>a,c</sup> Janhavi Nadkarni,<sup>c</sup> Vivek Kumar Gupta,<sup>d</sup> Sajad Hussain Syed,<sup>\*</sup>  
<sup>a,c</sup> and Asif Ali<sup>\*,a,b</sup>

<sup>a</sup>Academy of Scientific and Innovative Research

<sup>b</sup>Natural Product Chemistry Division, CSIR-Indian Institute of Integrative Medicine, Canal Road, Jammu 180001, India.

<sup>c</sup>Pharmacology division, CSIR-Indian Institute of Integrative Medicine, Canal Road, Jammu 180001, India.

<sup>d</sup>Post Graduate Department of Physics and Electronics, University of Jammu, Jammu Tawi 2006, India.

#### **Corresponding Author**

*\*E-mail:* asifali@iiim.ac.in; asifchem73@gmail.com

Tel.: +91-191-2569222. Fax: +91-191-25693331.

## Table of Contents

|                                                                                        |          |
|----------------------------------------------------------------------------------------|----------|
| Divergent Synthesis of (+)-( <i>S</i> )-Mahanimbine ( <b>1</b> ).....                  | SI-03    |
| X-ray diffraction analysis of compound <b>2</b> .....                                  | SI-04-10 |
| X-ray diffraction analysis of compound <b>5</b> .....                                  | SI-10-16 |
| <sup>1</sup> H NMR Spectra of <b>1</b> and <b>2</b> .....                              | SI-17    |
| <sup>13</sup> C NMR Spectra of <b>2</b> & <sup>1</sup> H NMR Spectra of <b>3</b> ..... | SI-18    |
| <sup>13</sup> C NMR Spectra of <b>3</b> & <sup>1</sup> H NMR Spectra of <b>4</b> ..... | SI-19    |
| <sup>13</sup> C NMR Spectra of <b>4</b> & HREIMS of <b>5</b> .....                     | SI-20    |
| <sup>1</sup> H & <sup>13</sup> C NMR Spectra of <b>5</b> .....                         | SI-21    |
| DEPT 135 NMR of <b>5</b> & HREIMS of <b>6</b> .....                                    | SI-22    |
| <sup>1</sup> H & <sup>13</sup> C NMR Spectra of <b>6</b> .....                         | SI-23    |
| DEPT & HSQC NMR Spectra of <b>6</b> .....                                              | SI-24    |
| COSY & HMBC of <b>6</b> .....                                                          | SI-25    |
| <sup>1</sup> H & <sup>13</sup> C NMR Spectra of <b>7</b> .....                         | SI-26    |
| HREIMS & <sup>1</sup> H NMR of <b>8</b> .....                                          | SI-27    |
| <sup>13</sup> C & DEPT NMR Spectra of <b>8</b> .....                                   | SI-28    |
| HSQC & COSY NMR Spectra of <b>8</b> .....                                              | SI-29    |
| HMBC of <b>8</b> & <sup>1</sup> H NMR of <b>9</b> .....                                | SI-30    |
| <sup>13</sup> C NMR Spectra of <b>9</b> .....                                          | SI-31    |

**Supporting Fig. (SF) 1: Divergent Synthesis of (+)-(*S*)-Mahanimbine (1) by Vilsmeier-Haack reaction and Characterization Data for Compounds (2-9).**

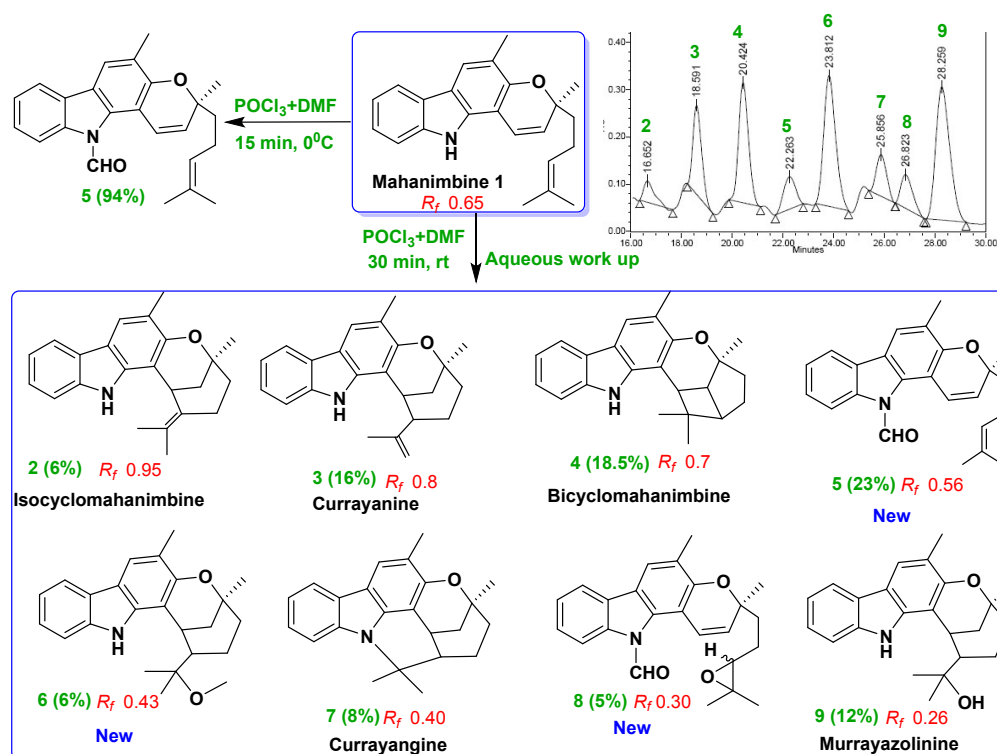

POCl<sub>3</sub> (0.5 mL, 5 mmol) was added drop wise to ice-cold dry DMF (20 mL) in a 150ml round bottle flask and stirred for 10–15 min at 0°C. The mixture was degassed by vacuum under a nitrogen atmosphere and brought to the room temperature before adding (drop by drop over a period of 5 minutes) 1ml DMF solution of compound 1 (0.5 g, 1.51 mmol) and stirred for 30 min. The reaction mixture was cooled; distilled water (50 ml) was added and further stirred for 5 min. The aqueous layer was extracted with ethyl acetate (60 mL x 3) and the combined organic extracts were dried over Na<sub>2</sub>SO<sub>4</sub>, filtered, and concentrated *in vacuo* to give 510 mg of dry residue. TLC [(Hex: EtOAc 9:1)] of the reaction mixture exhibited very close R<sub>f</sub> difference in which the compounds 2 (30 mg, 6%) isolated from fraction 3 (R<sub>f</sub> = 0.95), 3 (79 mg, 16%, Fr. 4, R<sub>f</sub> = 0.8), 4 (92.5 mg, 18.5%, Fr. 5, R<sub>f</sub> = 0.7) and 5 (118 mg, 23% Fr. 6, R<sub>f</sub> = 0.56) were purified by silica gel chromatography (230-400 mesh) eluting with a gradient of hexane/EtOAc (94:6, v/v). Remaining fraction 7, was the mixture of compound 6 and 7 (74 mg), which was purified by semi-preparative HPLC using waters spherisorb reversed-phase (C<sub>18</sub>, 250 X 10 mm, 5μm) column eluting with acetonitrile at a flow rate of 2.5 mL min<sup>-1</sup> to give 6 (29 mg, 6%) with a *t<sub>R</sub>* of 14.60 min., 7 (38 mg, 8%) with a *t<sub>R</sub>* of 19.26 min. The fraction 9 (90 mg) mixture of compound 8 & 9 which were purified by semi-preparative HPLC eluting with a mixture of acetonitrile and H<sub>2</sub>O 9:1 (v/v) at a flow rate of 3.0 mL min<sup>-1</sup> to yield 8 (26 mg, 5%) with a *t<sub>R</sub>* of 13.8 min., 9 (57 mg, 12%) with a *t<sub>R</sub>* of 17.2 min.

**Compound 2: X-ray crystallographic Data of 5,7-Dimethyl-2-(propan-2-ylidene)-1,2,3,4,5,13-hexahydro-1,5-methano-oxocino[3,2-a]carbazole (2):** X-ray intensity data of 2884 and 7064 reflections were collected on *X'calibur* CD area-detector diffractometer equipped with graphite monochromated MoK $\alpha$  radiation ( $\lambda = 0.71073 \text{ \AA}$ ). The crystal used for data collection was of dimensions 0.30 x 0.20 x 0.20 mm. The cell dimensions were determined by least-squares fit of angular settings of 966 reflections in the  $\theta$  range 3.8–28.6°. Data were corrected for Lorentz, polarisation and absorption factors. The crystallographic data are summarized in Table 1.

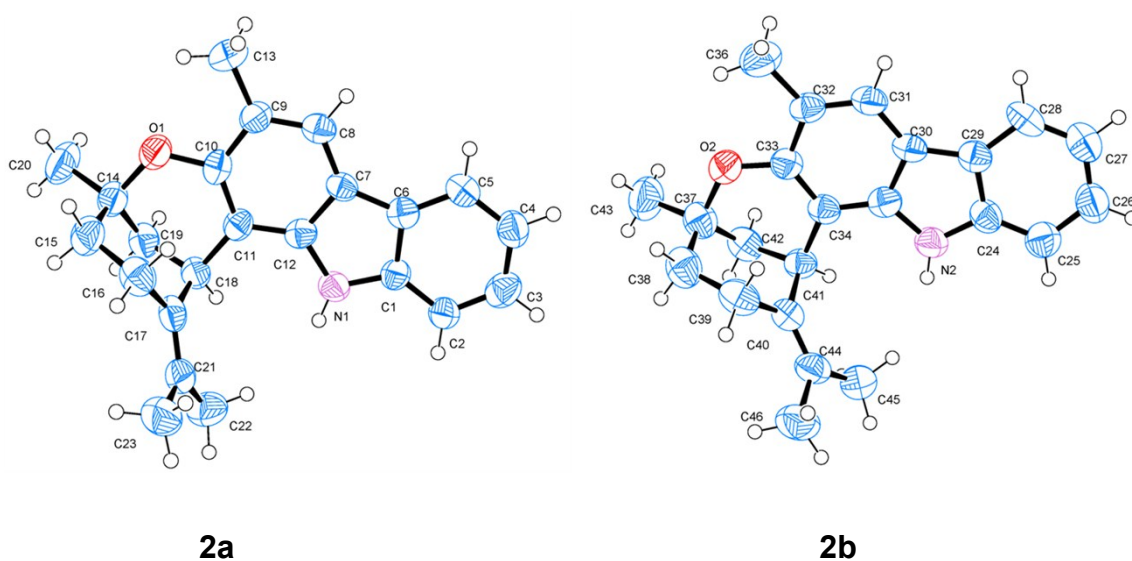

**Fig. S1:** CCDC No. 1058032 of compound **2** which crystallized in monoclinic space group  $P2_1/c$  with two molecules  $a = 8.4284 (6) \text{ \AA}$ ,  $b = 18.5039 (14) \text{ \AA}$ ,  $c = 23.3119 (16) \text{ \AA}$ ;  $\alpha = 90^\circ$ ,  $\beta = 93.85^\circ$ ,  $\gamma = 90^\circ$ . These two molecules are present in unit cell.

**Table 1. Crystal and diffraction parameter**

|                                      |                                                         |
|--------------------------------------|---------------------------------------------------------|
| Empirical formula                    | $C_{46}H_{50}N_2O_2$                                    |
| Crystal habit                        | Rod, Colourless                                         |
| CCDC no:                             | 1058032                                                 |
| Crystal size [mm]                    | $0.36 \times 0.21 \times 0.18$                          |
| Crystallizing solvent                | Hexane: EtOAc (1:1)                                     |
| Space group                          | Monoclinic, $P2_1/c$                                    |
| $a$ [ $\text{\AA}$ ]                 | 8.4284 (6)                                              |
| $b$ [ $\text{\AA}$ ]                 | 18.5039 (14)                                            |
| $c$ [ $\text{\AA}$ ]                 | 23.3119 (16)                                            |
| $\alpha, \beta, \gamma$ [ $^\circ$ ] | 90.0, 93.85, 90.0                                       |
| Volume [ $\text{\AA}^3$ ]            | 3627.5 (5)                                              |
| $Z / Z'$                             | $Z: 4 \quad Z': 0$                                      |
| Molecular weight                     | 662.88                                                  |
| Density [calc.]                      | $1.214 \text{ Mg m}^{-3}$                               |
| $F(000)$                             | 1424                                                    |
| Radiation                            | Mo $K\alpha$ radiation, $\lambda = 0.71073 \text{ \AA}$ |

|                                             |                |
|---------------------------------------------|----------------|
| Temperature                                 | 293K           |
| $\theta$ Range [°]                          | 3.8–28.6°      |
| Scan type                                   | $\omega$ scans |
| Measured reflections                        | 14007          |
| $R_{\text{int}}$                            | 0.070          |
| Independent reflections                     | 7064           |
| Observed reflections [ $ F  > 4\sigma(F)$ ] | 2884           |
| Final $R$ / $wR2$ [%]                       | 0.079          |
| Final $wR2$ [%]                             | 0.227          |
| Goodness - of - fit (S)                     | 0.99           |
| Restraints / Parameters                     | 0/452          |

**Table 2.** Atomic coordinates and isotropic or equivalent isotropic displacement parameters ( $\text{\AA}^2$ )

|      | $x$         | $y$          | $z$          | $U_{\text{iso}}^*/U_{\text{eq}}$ |
|------|-------------|--------------|--------------|----------------------------------|
| N1   | 0.3032 (3)  | 0.38494 (15) | 0.52985 (12) | 0.0500 (8)                       |
| H1   | 0.2273      | 0.4137       | 0.5184       | 0.060*                           |
| C1   | 0.4503 (4)  | 0.40571 (19) | 0.55442 (15) | 0.0469 (9)                       |
| C2   | 0.5080 (4)  | 0.4742 (2)   | 0.56501 (15) | 0.0545 (10)                      |
| H2   | 0.4464      | 0.5147       | 0.5556       | 0.065*                           |
| C3   | 0.6617 (5)  | 0.4809 (2)   | 0.59035 (17) | 0.0647 (11)                      |
| H3   | 0.7029      | 0.5266       | 0.5987       | 0.078*                           |
| C4   | 0.7542 (4)  | 0.4202 (2)   | 0.60329 (16) | 0.0610 (11)                      |
| H4   | 0.8570      | 0.4258       | 0.6198       | 0.073*                           |
| C5   | 0.6953 (4)  | 0.3519 (2)   | 0.59188 (15) | 0.0545 (10)                      |
| H5   | 0.7578      | 0.3116       | 0.6010       | 0.065*                           |
| C6   | 0.5428 (4)  | 0.3434 (2)   | 0.56679 (14) | 0.0471 (9)                       |
| C7   | 0.4447 (4)  | 0.28217 (19) | 0.54958 (14) | 0.0437 (9)                       |
| C8   | 0.4700 (4)  | 0.20798 (19) | 0.54916 (15) | 0.0497 (9)                       |
| H8   | 0.5669      | 0.1894       | 0.5638       | 0.060*                           |
| C9   | 0.3531 (4)  | 0.1614 (2)   | 0.52726 (16) | 0.0511 (9)                       |
| C10  | 0.2067 (4)  | 0.1922 (2)   | 0.50599 (15) | 0.0498 (9)                       |
| C11  | 0.1741 (4)  | 0.2653 (2)   | 0.50584 (15) | 0.0469 (9)                       |
| C12  | 0.2986 (4)  | 0.30936 (19) | 0.52676 (14) | 0.0460 (9)                       |
| C13  | 0.3800 (5)  | 0.0820 (2)   | 0.5230 (2)   | 0.0765 (13)                      |
| H13A | 0.2853      | 0.0593       | 0.5063       | 0.115*                           |
| H13B | 0.4054      | 0.0626       | 0.5606       | 0.115*                           |
| H13C | 0.4664      | 0.0731       | 0.4991       | 0.115*                           |
| O1   | 0.0964 (3)  | 0.14175 (13) | 0.48452 (11) | 0.0609 (7)                       |
| C14  | -0.0597 (4) | 0.1670 (2)   | 0.46159 (17) | 0.0569 (10)                      |
| C15  | -0.0510 (5) | 0.1828 (2)   | 0.39755 (17) | 0.0683 (12)                      |
| H15A | -0.1575     | 0.1926       | 0.3810       | 0.082*                           |
| H15B | -0.0124     | 0.1400       | 0.3789       | 0.082*                           |
| C16  | 0.0563 (4)  | 0.2465 (2)   | 0.38472 (16) | 0.0633 (11)                      |
| H16A | 0.1665      | 0.2332       | 0.3935       | 0.076*                           |
| H16B | 0.0430      | 0.2583       | 0.3441       | 0.076*                           |
| C17  | 0.0165 (4)  | 0.3118 (2)   | 0.41982 (16) | 0.0516 (10)                      |
| C18  | 0.0149 (4)  | 0.2937 (2)   | 0.48334 (15) | 0.0504 (9)                       |

|      |             |              |              |             |
|------|-------------|--------------|--------------|-------------|
| H18  | -0.0117     | 0.3370       | 0.5049       | 0.060*      |
| C19  | -0.1059 (4) | 0.2344 (2)   | 0.49272 (16) | 0.0560 (10) |
| H19A | -0.1089     | 0.2245       | 0.5335       | 0.067*      |
| H19B | -0.2110     | 0.2501       | 0.4783       | 0.067*      |
| C20  | -0.1701 (5) | 0.1037 (2)   | 0.4711 (2)   | 0.0842 (14) |
| H20A | -0.1367     | 0.0625       | 0.4500       | 0.126*      |
| H20B | -0.2769     | 0.1164       | 0.4581       | 0.126*      |
| H20C | -0.1663     | 0.0921       | 0.5114       | 0.126*      |
| C21  | -0.0134 (4) | 0.3776 (2)   | 0.39641 (18) | 0.0584 (10) |
| C22  | -0.0703 (5) | 0.4393 (2)   | 0.4310 (2)   | 0.0804 (13) |
| H22A | -0.0847     | 0.4812       | 0.4069       | 0.121*      |
| H22B | 0.0069      | 0.4496       | 0.4621       | 0.121*      |
| H22C | -0.1697     | 0.4267       | 0.4462       | 0.121*      |
| C23  | 0.0090 (5)  | 0.3928 (2)   | 0.33417 (18) | 0.0855 (14) |
| H23A | -0.0186     | 0.4422       | 0.3256       | 0.128*      |
| H23B | -0.0582     | 0.3613       | 0.3105       | 0.128*      |
| H23C | 0.1181      | 0.3846       | 0.3265       | 0.128*      |
| N2   | 0.2039 (3)  | 0.71475 (16) | 0.26890 (13) | 0.0589 (9)  |
| H2A  | 0.2743      | 0.6958       | 0.2485       | 0.071*      |
| C24  | 0.0611 (4)  | 0.6826 (2)   | 0.28099 (17) | 0.0558 (10) |
| C25  | -0.0004 (5) | 0.6172 (2)   | 0.26339 (17) | 0.0686 (12) |
| H25  | 0.0533      | 0.5876       | 0.2390       | 0.082*      |
| C26  | -0.1452 (5) | 0.5966 (2)   | 0.28302 (19) | 0.0741 (13) |
| H26  | -0.1890     | 0.5522       | 0.2719       | 0.089*      |
| C27  | -0.2256 (5) | 0.6412 (3)   | 0.31901 (19) | 0.0724 (12) |
| H27  | -0.3221     | 0.6261       | 0.3321       | 0.087*      |
| C28  | -0.1653 (4) | 0.7069 (2)   | 0.33551 (17) | 0.0629 (12) |
| H28  | -0.2201     | 0.7362       | 0.3599       | 0.075*      |
| C29  | -0.0209 (4) | 0.7301 (2)   | 0.31570 (15) | 0.0523 (10) |
| C30  | 0.0760 (4)  | 0.7939 (2)   | 0.32405 (15) | 0.0495 (9)  |
| C31  | 0.0607 (4)  | 0.8602 (2)   | 0.35122 (15) | 0.0558 (10) |
| H31  | -0.0293     | 0.8691       | 0.3711       | 0.067*      |
| C32  | 0.1748 (4)  | 0.9128 (2)   | 0.34940 (15) | 0.0535 (10) |
| C33  | 0.3142 (4)  | 0.8976 (2)   | 0.32030 (15) | 0.0541 (10) |
| C34  | 0.3389 (4)  | 0.8324 (2)   | 0.29499 (15) | 0.0500 (9)  |
| C35  | 0.2153 (4)  | 0.7825 (2)   | 0.29499 (15) | 0.0519 (10) |
| C36  | 0.1599 (5)  | 0.9867 (2)   | 0.37530 (19) | 0.0816 (14) |
| H36A | 0.2530      | 1.0146       | 0.3688       | 0.122*      |
| H36B | 0.1493      | 0.9823       | 0.4159       | 0.122*      |
| H36C | 0.0677      | 1.0105       | 0.3578       | 0.122*      |
| O2   | 0.4205 (3)  | 0.95376 (14) | 0.31953 (11) | 0.0664 (8)  |
| C37  | 0.5706 (4)  | 0.9437 (2)   | 0.29202 (18) | 0.0643 (11) |
| C38  | 0.5487 (5)  | 0.9632 (2)   | 0.22933 (19) | 0.0736 (12) |
| H38A | 0.6522      | 0.9648       | 0.2135       | 0.088*      |
| H38B | 0.5031      | 1.0113       | 0.2259       | 0.088*      |
| C39  | 0.4421 (5)  | 0.9108 (2)   | 0.19340 (16) | 0.0675 (12) |
| H39A | 0.3323      | 0.9191       | 0.2017       | 0.081*      |

|      |            |            |              |             |
|------|------------|------------|--------------|-------------|
| H39B | 0.4514     | 0.9211     | 0.1530       | 0.081*      |
| C40  | 0.4819 (4) | 0.8320 (2) | 0.20433 (16) | 0.0547 (10) |
| C41  | 0.4942 (4) | 0.8166 (2) | 0.26788 (14) | 0.0515 (10) |
| H41  | 0.5224     | 0.7657     | 0.2742       | 0.062*      |
| C42  | 0.6219 (4) | 0.8648 (2) | 0.29922 (17) | 0.0628 (11) |
| H42A | 0.6330     | 0.8523     | 0.3397       | 0.075*      |
| H42B | 0.7237     | 0.8574     | 0.2830       | 0.075*      |
| C43  | 0.6867 (5) | 0.9946 (2) | 0.3234 (2)   | 0.0911 (15) |
| H43A | 0.6994     | 0.9811     | 0.3633       | 0.137*      |
| H43B | 0.6469     | 1.0431     | 0.3203       | 0.137*      |
| H43C | 0.7877     | 0.9918     | 0.3068       | 0.137*      |
| C44  | 0.5061 (4) | 0.7835 (2) | 0.16427 (17) | 0.0622 (11) |
| C45  | 0.5445 (5) | 0.7049 (2) | 0.1761 (2)   | 0.0826 (14) |
| H45A | 0.5577     | 0.6803     | 0.1405       | 0.124*      |
| H45B | 0.4593     | 0.6829     | 0.1952       | 0.124*      |
| H45C | 0.6412     | 0.7015     | 0.2002       | 0.124*      |
| C46  | 0.4935 (5) | 0.8021 (3) | 0.10045 (17) | 0.0890 (15) |
| H46A | 0.5152     | 0.7598     | 0.0785       | 0.134*      |
| H46B | 0.5693     | 0.8391     | 0.0931       | 0.134*      |
| H46C | 0.3882     | 0.8192     | 0.0896       | 0.134*      |

**Table 3. Atomic displacement parameters ( $\text{\AA}^2$ )**

|     | $U^{11}$    | $U^{22}$    | $U^{33}$    | $U^{12}$     | $U^{13}$     | $U^{23}$     |
|-----|-------------|-------------|-------------|--------------|--------------|--------------|
| N1  | 0.0528 (18) | 0.0455 (18) | 0.0508 (18) | 0.0081 (15)  | -0.0022 (14) | -0.0060 (16) |
| C1  | 0.055 (2)   | 0.041 (2)   | 0.044 (2)   | 0.0005 (18)  | 0.0001 (17)  | -0.0081 (18) |
| C2  | 0.060 (2)   | 0.048 (2)   | 0.055 (2)   | 0.001 (2)    | -0.0086 (19) | -0.005 (2)   |
| C3  | 0.083 (3)   | 0.051 (3)   | 0.060 (3)   | -0.006 (2)   | 0.004 (2)    | -0.008 (2)   |
| C4  | 0.057 (2)   | 0.070 (3)   | 0.055 (2)   | -0.009 (2)   | -0.0049 (18) | 0.000 (2)    |
| C5  | 0.052 (2)   | 0.060 (3)   | 0.051 (2)   | 0.006 (2)    | -0.0008 (18) | 0.002 (2)    |
| C6  | 0.056 (2)   | 0.051 (2)   | 0.0341 (18) | 0.0013 (19)  | 0.0045 (16)  | -0.0022 (18) |
| C7  | 0.047 (2)   | 0.047 (2)   | 0.0364 (18) | 0.0054 (18)  | 0.0014 (16)  | 0.0029 (18)  |
| C8  | 0.052 (2)   | 0.050 (2)   | 0.048 (2)   | 0.0091 (19)  | 0.0039 (17)  | 0.0014 (19)  |
| C9  | 0.053 (2)   | 0.043 (2)   | 0.057 (2)   | -0.0016 (19) | 0.0052 (18)  | 0.000 (2)    |
| C10 | 0.052 (2)   | 0.050 (2)   | 0.048 (2)   | -0.0092 (19) | 0.0041 (17)  | -0.008 (2)   |
| C11 | 0.054 (2)   | 0.043 (2)   | 0.044 (2)   | -0.0016 (18) | 0.0043 (17)  | -0.0090 (18) |
| C12 | 0.056 (2)   | 0.042 (2)   | 0.0402 (19) | 0.0047 (19)  | 0.0062 (17)  | -0.0041 (18) |
| C13 | 0.086 (3)   | 0.041 (2)   | 0.102 (3)   | 0.004 (2)    | -0.005 (3)   | -0.001 (2)   |
| O1  | 0.0587 (16) | 0.0490 (16) | 0.0744 (18) | -0.0034 (13) | 0.0013 (13)  | -0.0082 (14) |
| C14 | 0.052 (2)   | 0.052 (2)   | 0.066 (3)   | -0.003 (2)   | 0.001 (2)    | -0.012 (2)   |
| C15 | 0.075 (3)   | 0.059 (3)   | 0.070 (3)   | -0.001 (2)   | -0.002 (2)   | -0.021 (2)   |
| C16 | 0.067 (2)   | 0.074 (3)   | 0.049 (2)   | 0.007 (2)    | 0.0014 (19)  | -0.011 (2)   |
| C17 | 0.0374 (19) | 0.060 (3)   | 0.057 (2)   | 0.0003 (19)  | -0.0031 (17) | -0.014 (2)   |
| C18 | 0.047 (2)   | 0.049 (2)   | 0.055 (2)   | 0.0071 (18)  | -0.0041 (17) | -0.0110 (19) |
| C19 | 0.049 (2)   | 0.062 (3)   | 0.057 (2)   | -0.001 (2)   | 0.0022 (18)  | -0.007 (2)   |
| C20 | 0.074 (3)   | 0.061 (3)   | 0.118 (4)   | -0.023 (2)   | 0.009 (3)    | -0.014 (3)   |
| C21 | 0.042 (2)   | 0.058 (3)   | 0.074 (3)   | -0.002 (2)   | -0.0069 (19) | -0.001 (2)   |
| C22 | 0.082 (3)   | 0.054 (3)   | 0.104 (4)   | 0.013 (2)    | 0.002 (3)    | 0.001 (3)    |

|     |             |             |             |              |             |              |
|-----|-------------|-------------|-------------|--------------|-------------|--------------|
| C23 | 0.086 (3)   | 0.090 (4)   | 0.078 (3)   | -0.009 (3)   | -0.011 (2)  | 0.023 (3)    |
| N2  | 0.064 (2)   | 0.052 (2)   | 0.062 (2)   | 0.0031 (17)  | 0.0190 (17) | -0.0011 (17) |
| C24 | 0.058 (2)   | 0.053 (2)   | 0.057 (2)   | 0.000 (2)    | 0.0085 (19) | 0.010 (2)    |
| C25 | 0.078 (3)   | 0.063 (3)   | 0.065 (3)   | -0.003 (2)   | 0.008 (2)   | 0.000 (2)    |
| C26 | 0.073 (3)   | 0.075 (3)   | 0.075 (3)   | -0.018 (3)   | 0.008 (2)   | 0.007 (3)    |
| C27 | 0.065 (3)   | 0.074 (3)   | 0.080 (3)   | -0.007 (2)   | 0.014 (2)   | 0.012 (3)    |
| C28 | 0.049 (2)   | 0.084 (3)   | 0.058 (2)   | 0.002 (2)    | 0.0156 (19) | 0.016 (2)    |
| C29 | 0.057 (2)   | 0.054 (2)   | 0.045 (2)   | 0.004 (2)    | 0.0033 (18) | 0.008 (2)    |
| C30 | 0.049 (2)   | 0.056 (2)   | 0.045 (2)   | 0.0112 (19)  | 0.0103 (17) | 0.005 (2)    |
| C31 | 0.057 (2)   | 0.059 (3)   | 0.053 (2)   | 0.010 (2)    | 0.0163 (19) | 0.001 (2)    |
| C32 | 0.062 (2)   | 0.051 (2)   | 0.049 (2)   | 0.013 (2)    | 0.0064 (19) | 0.000 (2)    |
| C33 | 0.059 (2)   | 0.054 (2)   | 0.051 (2)   | 0.000 (2)    | 0.0077 (19) | 0.000 (2)    |
| C34 | 0.055 (2)   | 0.051 (2)   | 0.044 (2)   | 0.006 (2)    | 0.0064 (17) | 0.0057 (19)  |
| C35 | 0.066 (2)   | 0.047 (2)   | 0.043 (2)   | 0.009 (2)    | 0.0036 (18) | 0.0072 (19)  |
| C36 | 0.091 (3)   | 0.068 (3)   | 0.087 (3)   | 0.014 (3)    | 0.018 (3)   | -0.011 (3)   |
| O2  | 0.0673 (17) | 0.0563 (17) | 0.0769 (19) | -0.0029 (15) | 0.0144 (15) | -0.0102 (16) |
| C37 | 0.054 (2)   | 0.067 (3)   | 0.072 (3)   | 0.001 (2)    | 0.005 (2)   | 0.008 (3)    |
| C38 | 0.075 (3)   | 0.062 (3)   | 0.084 (3)   | 0.005 (2)    | 0.007 (2)   | 0.018 (3)    |
| C39 | 0.069 (3)   | 0.082 (3)   | 0.050 (2)   | 0.010 (2)    | 0.002 (2)   | 0.018 (2)    |
| C40 | 0.052 (2)   | 0.060 (3)   | 0.053 (2)   | -0.001 (2)   | 0.0080 (18) | 0.004 (2)    |
| C41 | 0.056 (2)   | 0.054 (2)   | 0.046 (2)   | 0.0056 (19)  | 0.0043 (18) | 0.0023 (19)  |
| C42 | 0.058 (2)   | 0.071 (3)   | 0.058 (2)   | 0.006 (2)    | 0.0025 (19) | 0.013 (2)    |
| C43 | 0.089 (3)   | 0.082 (4)   | 0.101 (4)   | -0.024 (3)   | -0.003 (3)  | -0.009 (3)   |
| C44 | 0.050 (2)   | 0.084 (3)   | 0.054 (2)   | -0.003 (2)   | 0.0110 (19) | -0.004 (2)   |
| C45 | 0.090 (3)   | 0.074 (3)   | 0.086 (3)   | -0.006 (3)   | 0.027 (3)   | -0.015 (3)   |
| C46 | 0.094 (3)   | 0.120 (4)   | 0.055 (3)   | -0.013 (3)   | 0.011 (2)   | -0.004 (3)   |

**Table 4. Geometric parameters**

**Bond Length (Å)**

|         |           |         |           |
|---------|-----------|---------|-----------|
| N1—C1   | 1.385 (4) | N2—C24  | 1.388 (4) |
| N1—C12  | 1.401 (4) | N2—C35  | 1.394 (4) |
| C1—C2   | 1.373 (5) | C24—C25 | 1.369 (5) |
| C1—C6   | 1.411 (5) | C24—C29 | 1.407 (5) |
| C2—C3   | 1.393 (5) | C25—C26 | 1.385 (5) |
| C3—C4   | 1.389 (5) | C26—C27 | 1.386 (5) |
| C4—C5   | 1.377 (5) | C27—C28 | 1.363 (5) |
| C5—C6   | 1.385 (4) | C28—C29 | 1.398 (5) |
| C6—C7   | 1.443 (5) | C29—C30 | 1.442 (5) |
| C7—C8   | 1.389 (4) | C30—C31 | 1.390 (5) |
| C7—C12  | 1.401 (4) | C30—C35 | 1.411 (4) |
| C8—C9   | 1.380 (5) | C31—C32 | 1.371 (5) |
| C9—C10  | 1.418 (5) | C32—C33 | 1.424 (4) |
| C9—C13  | 1.492 (5) | C32—C36 | 1.504 (5) |
| C10—C11 | 1.380 (5) | C33—C34 | 1.366 (5) |
| C10—O1  | 1.388 (4) | C33—O2  | 1.372 (4) |
| C11—C12 | 1.391 (4) | C34—C35 | 1.391 (5) |
| C11—C18 | 1.503 (4) | C34—C41 | 1.520 (4) |
| O1—C14  | 1.463 (4) | O2—C37  | 1.468 (4) |



|                        |           |             |           |
|------------------------|-----------|-------------|-----------|
| C14—C19                | 1.508 (5) | C37—C38     | 1.504 (5) |
| C14—C15                | 1.528 (5) | C37—C43     | 1.512 (5) |
| C14—C20                | 1.522 (5) | C37—C42     | 1.530 (5) |
| C15—C16                | 1.528 (5) | C38—C39     | 1.533 (5) |
| C16—C17                | 1.509 (5) | C39—C40     | 1.512 (5) |
| C17—C21                | 1.352 (5) | C40—C44     | 1.322 (5) |
| C17—C18                | 1.519 (5) | C40—C41     | 1.506 (5) |
| C18—C19                | 1.523 (4) | C41—C42     | 1.544 (5) |
| C21—C22                | 1.495 (5) | C44—C45     | 1.511 (5) |
| C21—C23                | 1.502 (5) | C44—C46     | 1.524 (5) |
| <b>Bond Angles (°)</b> |           |             |           |
| C1—N1—C12              | 108.6 (3) | C24—N2—C35  | 109.4 (3) |
| C2—C1—N1               | 128.8 (3) | C25—C24—N2  | 129.4 (4) |
| C2—C1—C6               | 122.2 (3) | C25—C24—C29 | 122.2 (4) |
| N1—C1—C6               | 109.0 (3) | N2—C24—C29  | 108.4 (3) |
| C1—C2—C3               | 117.8 (4) | C24—C25—C26 | 118.0 (4) |
| C4—C3—C2               | 120.8 (4) | C27—C26—C25 | 120.9 (4) |
| C5—C4—C3               | 120.7 (3) | C28—C27—C26 | 120.9 (4) |
| C4—C5—C6               | 119.9 (4) | C27—C28—C29 | 119.8 (4) |
| C5—C6—C1               | 118.5 (3) | C28—C29—C24 | 118.1 (4) |
| C5—C6—C7               | 134.8 (3) | C28—C29—C30 | 134.8 (4) |
| C1—C6—C7               | 106.6 (3) | C24—C29—C30 | 107.0 (3) |
| C8—C7—C12              | 118.9 (3) | C31—C30—C35 | 117.2 (3) |
| C8—C7—C6               | 133.8 (3) | C31—C30—C29 | 135.7 (3) |
| C12—C7—C6              | 107.2 (3) | C35—C30—C29 | 107.2 (3) |
| C9—C8—C7               | 120.9 (3) | C32—C31—C30 | 121.7 (3) |
| C8—C9—C10              | 117.5 (3) | C31—C32—C33 | 118.5 (3) |
| C8—C9—C13              | 122.1 (3) | C31—C32—C36 | 123.8 (3) |
| C10—C9—C13             | 120.3 (3) | C33—C32—C36 | 117.7 (3) |
| C11—C10—O1             | 122.0 (3) | C34—C33—O2  | 123.0 (3) |
| C11—C10—C9             | 124.3 (3) | C34—C33—C32 | 122.3 (4) |
| O1—C10—C9              | 113.7 (3) | O2—C33—C32  | 114.7 (3) |
| C10—C11—C12            | 115.3 (3) | C33—C34—C35 | 116.8 (3) |
| C10—C11—C18            | 121.1 (3) | C33—C34—C41 | 120.7 (3) |
| C12—C11—C18            | 123.5 (3) | C35—C34—C41 | 122.6 (3) |
| C11—C12—N1             | 128.4 (3) | C34—C35—N2  | 128.8 (3) |
| C11—C12—C7             | 123.1 (3) | C34—C35—C30 | 123.3 (3) |
| N1—C12—C7              | 108.6 (3) | N2—C35—C30  | 108.0 (3) |
| C10—O1—C14             | 118.8 (3) | C33—O2—C37  | 119.5 (3) |
| O1—C14—C19             | 110.1 (3) | O2—C37—C38  | 109.9 (3) |
| O1—C14—C15             | 108.5 (3) | O2—C37—C43  | 105.0 (3) |
| C19—C14—C15            | 110.1 (3) | C38—C37—C43 | 110.8 (4) |
| O1—C14—C20             | 104.1 (3) | O2—C37—C42  | 108.6 (3) |
| C19—C14—C20            | 112.7 (3) | C38—C37—C42 | 110.5 (4) |
| C15—C14—C20            | 111.1 (3) | C43—C37—C42 | 111.9 (3) |
| C14—C15—C16            | 114.0 (3) | C37—C38—C39 | 114.1 (3) |
| C17—C16—C15            | 110.8 (3) | C40—C39—C38 | 113.7 (3) |

|             |           |             |           |
|-------------|-----------|-------------|-----------|
| C21—C17—C16 | 123.0 (4) | C44—C40—C41 | 124.2 (4) |
| C21—C17—C18 | 125.3 (3) | C44—C40—C39 | 125.4 (4) |
| C16—C17—C18 | 111.7 (3) | C41—C40—C39 | 110.4 (3) |
| C11—C18—C17 | 110.6 (3) | C40—C41—C34 | 111.6 (3) |
| C11—C18—C19 | 106.7 (3) | C40—C41—C42 | 110.8 (3) |
| C17—C18—C19 | 110.4 (3) | C34—C41—C42 | 106.5 (3) |
| C14—C19—C18 | 109.3 (3) | C37—C42—C41 | 108.5 (3) |
| C17—C21—C22 | 121.9 (4) | C40—C44—C45 | 124.5 (4) |
| C17—C21—C23 | 121.8 (4) | C40—C44—C46 | 122.1 (4) |
| C22—C21—C23 | 116.4 (4) | C45—C44—C46 | 113.3 (4) |

**Compound 5: X-ray crystallographic Data of 3,5-Dimethyl-3-(4-methylpent-3-en-1-yl)pyrano[3,2-a]-carbazole-11(3H)-carbaldehyde.**

X-ray intensity data of 3858 reflections (of which 1967 unique) were collected on *X'calibur* CD area-detector diffractometer equipped with graphite monochromated MoK $\alpha$  radiation ( $\lambda = 0.71073$  Å). The crystal used for data collection was of dimensions 0.30 x 0.20 x 0.20 mm. The cell dimensions were determined by least-squares fit of angular settings of 966 reflections in the  $\theta$  range 3.97 to 23.11°. The intensities were measured by  $\omega$  scan mode for  $\theta$  ranges 3.63 to 26.00°. 1130 reflections were treated as observed ( $I > 2\sigma(I)$ ). Data were corrected for Lorentz, polarisation and absorption factors. The structure was solved by direct methods using SHELXS97 [1]. All non-hydrogen atoms of the molecule were located in the best E-map. All the hydrogen atoms were geometrically fixed and allowed to ride on the corresponding non-hydrogen atoms with C-H = 0.93-0.98 Å, and  $U_{\text{iso}} = 1.5U_{\text{eq}}$  of the attached C atom for methyl H atoms and 1.2  $U_{\text{eq}}$  for other H atoms. Full-matrix least-squares refinement was carried out using SHELXL97 [1]. The final refinement cycles converged to an  $R = 0.0531$  and  $wR(F^2) = 0.1069$  for 1130 observed data. Residual electron densities ranged from -0.152 to 0.121 eÅ<sup>-3</sup>. Atomic scattering factors were taken from International Tables for X-ray Crystallography (1992, Vol. C, Tables 4.2.6.8 and 6.1.1.4).

The geometry of the molecule was calculated using the PLATON [2] and PARST [3] software's. The crystallographic data are summarized in Table 1.

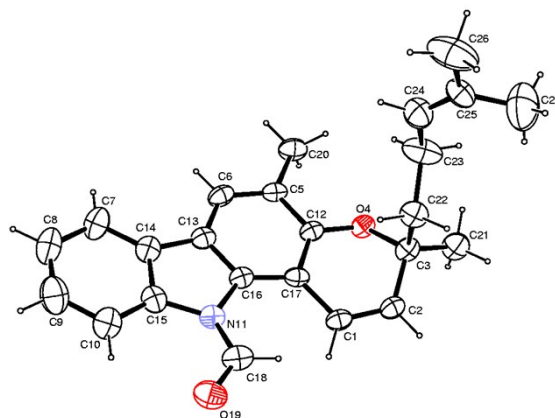

**Fig. S2:** CCDC No. 975379 of compound **5** and *ORTEP* view of the molecule with displacement ellipsoids drawn at 50% probability level H atoms are shown as small spheres of arbitrary radii.

1. Hubschle, C. B.; Sheldrick, G. M.; Dittrich, B. *J. Appl. Crystallogr.* **2011**, 44, 1281-1284.
2. Spek, A. L. *Acta Crystallogr. D Biol. Crystallogr.* **2009**, 65, 148-155.
3. Nardelli, M. *J. of App. Crystallogr.* **1995**, 28, 659.

**Table 1. Crystal and diffraction parameter**

|                                             |                                                            |
|---------------------------------------------|------------------------------------------------------------|
| Empirical formula                           | C <sub>24</sub> H <sub>25</sub> NO <sub>2</sub>            |
| Crystal habit                               | White                                                      |
| Crystal size [mm]                           | 0.3 x 0.2 x 0.2                                            |
| Crystallizing solvent                       | Ethyl acetate                                              |
| CCDC No.                                    | 975379                                                     |
| Space group                                 | Monoclinic, P 2 <sub>1</sub>                               |
| <i>a</i> [Å]                                | 5.6204(5)                                                  |
| <i>b</i> [Å]                                | 25.209(3)                                                  |
| <i>c</i> [Å]                                | 6.9669(6)                                                  |
| $\alpha, \beta, \gamma$ [°]                 | 90.0 <sup>0</sup> , 93.88 <sup>0</sup> , 90.0 <sup>0</sup> |
| Volume [Å <sup>3</sup> ]                    | 984.835                                                    |
| <i>Z</i> / <i>Z'</i>                        | <i>Z</i> : 2 <i>Z'</i> : 0                                 |
| Molecular weight                            | 359.45                                                     |
| Density [calc.]                             | 1.212 Mg m <sup>-3</sup>                                   |
| <i>F</i> (000)                              | 384                                                        |
| Radiation                                   | Mo K $\alpha$ radiation, $\lambda = 0.71073$ Å             |
| Temperature [°C]                            | 25                                                         |
| $\theta$ Range [°]                          | 4.0-23.1                                                   |
| Scan type                                   | $\omega$ scans                                             |
| Measured reflections                        | 3858                                                       |
| R <sub>int</sub>                            | 0.036                                                      |
| Independent reflections                     | 1967                                                       |
| Observed reflections [ $ F  > 4\sigma(F)$ ] | 1130                                                       |

|                                                                    |                                                        |
|--------------------------------------------------------------------|--------------------------------------------------------|
| Final $R$ / $wR2$ [%]                                              | 0.053                                                  |
| Final $wR2$ [%]                                                    | 0.107                                                  |
| Goodness - of - fit (S)                                            | 0.93                                                   |
| $\Delta\rho_{\max}$ / $\Delta\rho_{\min}$ [ $e \text{ \AA}^{-3}$ ] | 0.12 $e \text{ \AA}^{-3}$ / -0.15 $e \text{ \AA}^{-3}$ |
| Restraints / Parameters                                            | 1/248                                                  |

Table 2. Atomic coordinates and isotropic or equivalent isotropic displacement parameters ( $\text{\AA}^2$ )

|      | $x$          | $y$          | $z$         | $U_{\text{iso}}^*/U_{\text{eq}}$ |
|------|--------------|--------------|-------------|----------------------------------|
| C1   | 0.0671 (7)   | 0.2946 (2)   | 0.7095 (6)  | 0.0540 (12)                      |
| H1   | -0.0161      | 0.3172       | 0.6237      | 0.065*                           |
| C2   | 0.1400 (7)   | 0.2471 (2)   | 0.6492 (6)  | 0.0559 (12)                      |
| H2   | 0.1158       | 0.2374       | 0.5206      | 0.067*                           |
| C3   | 0.2606 (7)   | 0.21015 (19) | 0.7921 (6)  | 0.0547 (12)                      |
| O4   | 0.4138 (4)   | 0.24196 (13) | 0.9270 (4)  | 0.0513 (8)                       |
| C5   | 0.4081 (7)   | 0.30001 (19) | 1.1895 (6)  | 0.0492 (12)                      |
| C6   | 0.3082 (7)   | 0.34310 (19) | 1.2757 (7)  | 0.0559 (13)                      |
| H6   | 0.3732       | 0.3552       | 1.3940      | 0.067*                           |
| C7   | -0.0268 (9)  | 0.4423 (2)   | 1.4166 (9)  | 0.0792 (17)                      |
| H7   | 0.0920       | 0.4370       | 1.5142      | 0.095*                           |
| C8   | -0.2008 (11) | 0.4810 (3)   | 1.4341 (10) | 0.096 (2)                        |
| H8   | -0.1977      | 0.5021       | 1.5437      | 0.115*                           |
| C9   | -0.3797 (11) | 0.4881 (3)   | 1.2876 (11) | 0.098 (2)                        |
| H9   | -0.4955      | 0.5139       | 1.3029      | 0.117*                           |
| C10  | -0.3911 (9)  | 0.4586 (2)   | 1.1215 (9)  | 0.0766 (16)                      |
| H10  | -0.5120      | 0.4635       | 1.0254      | 0.092*                           |
| N11  | -0.1889 (6)  | 0.38368 (15) | 0.9547 (5)  | 0.0517 (10)                      |
| C12  | 0.3082 (7)   | 0.28389 (19) | 1.0087 (6)  | 0.0451 (11)                      |
| C13  | 0.1092 (7)   | 0.36890 (18) | 1.1863 (6)  | 0.0504 (12)                      |
| C14  | -0.0342 (8)  | 0.41214 (19) | 1.2529 (7)  | 0.0588 (13)                      |
| C15  | -0.2131 (8)  | 0.4209 (2)   | 1.1041 (8)  | 0.0591 (13)                      |
| C16  | 0.0139 (7)   | 0.35179 (18) | 1.0075 (6)  | 0.0472 (11)                      |
| C17  | 0.1171 (7)   | 0.31069 (17) | 0.9075 (6)  | 0.0461 (12)                      |
| C18  | -0.3574 (8)  | 0.3731 (2)   | 0.8077 (7)  | 0.0651 (14)                      |
| H18  | -0.3430      | 0.3418       | 0.7391      | 0.078*                           |
| O19  | -0.5247 (6)  | 0.40230 (15) | 0.7615 (5)  | 0.0781 (11)                      |
| C20  | 0.6215 (7)   | 0.2715 (2)   | 1.2820 (7)  | 0.0674 (16)                      |
| H201 | 0.7603       | 0.2804       | 1.2157      | 0.101*                           |
| H202 | 0.5951       | 0.2339       | 1.2749      | 0.101*                           |
| H203 | 0.6451       | 0.2821       | 1.4143      | 0.101*                           |
| C21  | 0.4295 (8)   | 0.1735 (2)   | 0.7013 (8)  | 0.0741 (16)                      |
| H211 | 0.5450       | 0.1938       | 0.6376      | 0.111*                           |
| H212 | 0.3424       | 0.1512       | 0.6094      | 0.111*                           |
| H213 | 0.5095       | 0.1518       | 0.7989      | 0.111*                           |
| C22  | 0.0757 (7)   | 0.1814 (2)   | 0.9056 (7)  | 0.0624 (14)                      |
| H221 | -0.0190      | 0.1587       | 0.8179      | 0.075*                           |
| H222 | -0.0308      | 0.2077       | 0.9548      | 0.075*                           |
| C23  | 0.1785 (8)   | 0.1477 (3)   | 1.0743 (9)  | 0.095 (2)                        |

|      |              |            |             |             |
|------|--------------|------------|-------------|-------------|
| H231 | 0.2603       | 0.1173     | 1.0241      | 0.114*      |
| H232 | 0.2953       | 0.1685     | 1.1505      | 0.114*      |
| C24  | -0.0095 (10) | 0.1281 (3) | 1.2033 (9)  | 0.0864 (17) |
| H24  | -0.0512      | 0.1516     | 1.2986      | 0.104*      |
| C25  | -0.1180 (8)  | 0.0835 (2) | 1.1977 (8)  | 0.0684 (15) |
| C26  | -0.3046 (10) | 0.0685 (3) | 1.3288 (11) | 0.136 (3)   |
| H262 | -0.2436      | 0.0416     | 1.4161      | 0.203*      |
| H263 | -0.4419      | 0.0552     | 1.2545      | 0.203*      |
| H261 | -0.3489      | 0.0991     | 1.4003      | 0.203*      |
| C27  | -0.0764 (14) | 0.0422 (3) | 1.0568 (12) | 0.156 (4)   |
| H271 | -0.0050      | 0.0575     | 0.9485      | 0.233*      |
| H272 | -0.2255      | 0.0260     | 1.0145      | 0.233*      |
| H273 | 0.0285       | 0.0158     | 1.1148      | 0.233*      |

**Table 3. Atomic displacement parameters ( $\text{\AA}^2$ )**

|     | $U^{11}$    | $U^{22}$  | $U^{33}$    | $U^{12}$     | $U^{13}$     | $U^{23}$     |
|-----|-------------|-----------|-------------|--------------|--------------|--------------|
| C1  | 0.047 (2)   | 0.069 (4) | 0.045 (3)   | -0.003 (2)   | -0.006 (2)   | 0.005 (3)    |
| C2  | 0.055 (3)   | 0.066 (3) | 0.045 (3)   | -0.004 (3)   | -0.005 (2)   | -0.002 (3)   |
| C3  | 0.042 (2)   | 0.067 (3) | 0.054 (3)   | -0.002 (2)   | 0.000 (2)    | -0.005 (3)   |
| O4  | 0.0389 (14) | 0.064 (2) | 0.0504 (18) | -0.0014 (15) | -0.0021 (14) | -0.0026 (18) |
| C5  | 0.045 (2)   | 0.060 (3) | 0.042 (3)   | -0.007 (2)   | -0.001 (2)   | 0.012 (3)    |
| C6  | 0.055 (2)   | 0.070 (4) | 0.042 (3)   | -0.019 (3)   | -0.003 (2)   | 0.001 (3)    |
| C7  | 0.072 (3)   | 0.089 (4) | 0.077 (4)   | -0.010 (3)   | 0.008 (3)    | -0.027 (4)   |
| C8  | 0.103 (4)   | 0.091 (5) | 0.094 (5)   | -0.004 (4)   | 0.025 (4)    | -0.034 (4)   |
| C9  | 0.079 (4)   | 0.087 (5) | 0.129 (6)   | 0.010 (4)    | 0.019 (4)    | -0.019 (5)   |
| C10 | 0.068 (3)   | 0.080 (4) | 0.082 (4)   | -0.009 (3)   | 0.008 (3)    | -0.010 (4)   |
| N11 | 0.0457 (18) | 0.056 (3) | 0.053 (2)   | -0.0063 (18) | 0.0019 (19)  | 0.005 (2)    |
| C12 | 0.039 (2)   | 0.057 (3) | 0.040 (3)   | -0.010 (2)   | 0.005 (2)    | 0.005 (3)    |
| C13 | 0.047 (2)   | 0.056 (3) | 0.048 (3)   | -0.011 (2)   | 0.006 (2)    | 0.006 (3)    |
| C14 | 0.053 (3)   | 0.061 (3) | 0.064 (3)   | -0.012 (3)   | 0.012 (3)    | -0.003 (3)   |
| C15 | 0.053 (3)   | 0.055 (3) | 0.071 (3)   | -0.006 (3)   | 0.015 (3)    | 0.002 (3)    |
| C16 | 0.043 (2)   | 0.054 (3) | 0.044 (3)   | -0.008 (2)   | 0.002 (2)    | 0.004 (3)    |
| C17 | 0.038 (2)   | 0.054 (3) | 0.045 (3)   | -0.008 (2)   | -0.004 (2)   | 0.011 (3)    |
| C18 | 0.053 (3)   | 0.081 (4) | 0.061 (3)   | -0.012 (3)   | -0.001 (3)   | 0.012 (3)    |
| O19 | 0.0559 (18) | 0.089 (3) | 0.088 (3)   | 0.0084 (19)  | -0.0048 (19) | 0.013 (2)    |
| C20 | 0.052 (2)   | 0.085 (4) | 0.063 (3)   | -0.004 (3)   | -0.015 (2)   | 0.011 (3)    |
| C21 | 0.059 (3)   | 0.087 (4) | 0.076 (4)   | 0.009 (3)    | -0.001 (3)   | -0.005 (3)   |
| C22 | 0.039 (2)   | 0.072 (4) | 0.075 (4)   | -0.003 (2)   | -0.005 (2)   | 0.005 (3)    |
| C23 | 0.059 (3)   | 0.109 (5) | 0.115 (5)   | -0.016 (3)   | -0.009 (3)   | 0.052 (4)    |
| C24 | 0.091 (4)   | 0.076 (4) | 0.091 (5)   | 0.012 (4)    | 0.002 (4)    | 0.000 (4)    |
| C25 | 0.056 (3)   | 0.056 (3) | 0.094 (4)   | 0.006 (3)    | 0.008 (3)    | 0.012 (4)    |
| C26 | 0.096 (4)   | 0.145 (7) | 0.173 (7)   | 0.029 (4)    | 0.059 (5)    | 0.085 (6)    |
| C27 | 0.175 (8)   | 0.116 (7) | 0.177 (9)   | -0.036 (6)   | 0.026 (7)    | -0.046 (7)   |

**Table 4. Geometric parameters**

**Bond Length ( $\text{\AA}$ )**

|        |           |         |           |
|--------|-----------|---------|-----------|
| C1—C2  | 1.342 (6) | C13—C14 | 1.451 (6) |
| C1—C17 | 1.447 (6) | C14—C15 | 1.412 (6) |
| C1—H1  | 0.9300    | C16—C17 | 1.396 (6) |

|                        |           |               |           |
|------------------------|-----------|---------------|-----------|
| C2—C3                  | 1.492 (6) | C18—O19       | 1.220 (5) |
| C2—H2                  | 0.9300    | C18—H18       | 0.9300    |
| C3—O4                  | 1.469 (5) | C20—H201      | 0.9600    |
| C3—C21                 | 1.496 (6) | C20—H202      | 0.9600    |
| C3—C22                 | 1.530 (6) | C20—H203      | 0.9600    |
| O4—C12                 | 1.356 (5) | C21—H211      | 0.9600    |
| C5—C6                  | 1.379 (6) | C21—H212      | 0.9600    |
| C5—C12                 | 1.404 (5) | C21—H213      | 0.9600    |
| C5—C20                 | 1.505 (6) | C22—C23       | 1.533 (6) |
| C6—C13                 | 1.402 (6) | C22—H221      | 0.9700    |
| C6—H6                  | 0.9300    | C22—H222      | 0.9700    |
| C7—C14                 | 1.368 (6) | C23—C24       | 1.515 (7) |
| C7—C8                  | 1.393 (7) | C23—H231      | 0.9700    |
| C7—H7                  | 0.9300    | C23—H232      | 0.9700    |
| C8—C9                  | 1.395 (9) | C24—C25       | 1.278 (7) |
| C8—H8                  | 0.9300    | C24—H24       | 0.9300    |
| C9—C10                 | 1.374 (8) | C25—C27       | 1.462 (8) |
| C9—H9                  | 0.9300    | C25—C26       | 1.486 (7) |
| C10—C15                | 1.390 (6) | C26—H262      | 0.9600    |
| C10—H10                | 0.9300    | C26—H263      | 0.9600    |
| N11—C18                | 1.373 (5) | C26—H261      | 0.9600    |
| N11—C15                | 1.416 (6) | C27—H271      | 0.9600    |
| N11—C16                | 1.423 (5) | C27—H272      | 0.9600    |
| C12—C17                | 1.416 (5) | C27—H273      | 0.9600    |
| C13—C16                | 1.391 (6) |               |           |
| <b>Bond Angles (°)</b> |           |               |           |
| C2—C1—C17              | 120.4 (4) | C16—C17—C12   | 115.6 (4) |
| C2—C1—H1               | 119.8     | C16—C17—C1    | 128.6 (4) |
| C17—C1—H1              | 119.8     | C12—C17—C1    | 115.6 (4) |
| C1—C2—C3               | 118.8 (4) | O19—C18—N11   | 124.1 (5) |
| C1—C2—H2               | 120.6     | O19—C18—H18   | 118.0     |
| C3—C2—H2               | 120.6     | N11—C18—H18   | 118.0     |
| O4—C3—C2               | 107.8 (4) | C5—C20—H201   | 109.5     |
| O4—C3—C21              | 104.3 (3) | C5—C20—H202   | 109.5     |
| C2—C3—C21              | 112.1 (4) | H201—C20—H202 | 109.5     |
| O4—C3—C22              | 108.5 (3) | C5—C20—H203   | 109.5     |
| C2—C3—C22              | 110.3 (3) | H201—C20—H203 | 109.5     |
| C21—C3—C22             | 113.5 (4) | H202—C20—H203 | 109.5     |
| C12—O4—C3              | 116.1 (3) | C3—C21—H211   | 109.5     |
| C6—C5—C12              | 118.0 (4) | C3—C21—H212   | 109.5     |
| C6—C5—C20              | 121.7 (4) | H211—C21—H212 | 109.5     |
| C12—C5—C20             | 120.3 (4) | C3—C21—H213   | 109.5     |
| C5—C6—C13              | 120.5 (4) | H211—C21—H213 | 109.5     |
| C5—C6—H6               | 119.7     | H212—C21—H213 | 109.5     |
| C13—C6—H6              | 119.7     | C3—C22—C23    | 115.2 (4) |
| C14—C7—C8              | 118.7 (6) | C3—C22—H221   | 108.5     |
| C14—C7—H7              | 120.7     | C23—C22—H221  | 108.5     |

|                             |            |                 |            |
|-----------------------------|------------|-----------------|------------|
| C8—C7—H7                    | 120.7      | C3—C22—H222     | 108.5      |
| C7—C8—C9                    | 120.1 (6)  | C23—C22—H222    | 108.5      |
| C7—C8—H8                    | 119.9      | H221—C22—H222   | 107.5      |
| C9—C8—H8                    | 119.9      | C24—C23—C22     | 113.2 (4)  |
| C10—C9—C8                   | 122.4 (6)  | C24—C23—H231    | 108.9      |
| C10—C9—H9                   | 118.8      | C22—C23—H231    | 108.9      |
| C8—C9—H9                    | 118.8      | C24—C23—H232    | 108.9      |
| C9—C10—C15                  | 116.8 (5)  | C22—C23—H232    | 108.9      |
| C9—C10—H10                  | 121.6      | H231—C23—H232   | 107.8      |
| C15—C10—H10                 | 121.6      | C25—C24—C23     | 128.2 (6)  |
| C18—N11—C15                 | 125.5 (4)  | C25—C24—H24     | 115.9      |
| C18—N11—C16                 | 125.7 (4)  | C23—C24—H24     | 115.9      |
| C15—N11—C16                 | 107.5 (4)  | C24—C25—C27     | 123.4 (6)  |
| O4—C12—C5                   | 116.3 (4)  | C24—C25—C26     | 124.1 (6)  |
| O4—C12—C17                  | 120.1 (4)  | C27—C25—C26     | 112.5 (6)  |
| C5—C12—C17                  | 123.5 (4)  | C25—C26—H262    | 109.5      |
| C16—C13—C6                  | 120.1 (4)  | C25—C26—H263    | 109.5      |
| C16—C13—C14                 | 109.3 (4)  | H262—C26—H263   | 109.5      |
| C6—C13—C14                  | 130.6 (5)  | C25—C26—H261    | 109.5      |
| C7—C14—C15                  | 120.3 (5)  | H262—C26—H261   | 109.5      |
| C7—C14—C13                  | 134.2 (5)  | H263—C26—H261   | 109.5      |
| C15—C14—C13                 | 105.5 (4)  | C25—C27—H271    | 109.5      |
| C10—C15—C14                 | 121.6 (5)  | C25—C27—H272    | 109.5      |
| C10—C15—N11                 | 128.5 (5)  | H271—C27—H272   | 109.5      |
| C14—C15—N11                 | 109.6 (4)  | C25—C27—H273    | 109.5      |
| C13—C16—C17                 | 121.9 (4)  | H271—C27—H273   | 109.5      |
| C13—C16—N11                 | 108.0 (4)  | H272—C27—H273   | 109.5      |
| C17—C16—N11                 | 130.0 (4)  |                 |            |
| <b>Torsional Angles (°)</b> |            |                 |            |
| C17—C1—C2—C3                | 3.5 (6)    | C18—N11—C15—C10 | -9.0 (7)   |
| C1—C2—C3—O4                 | -38.0 (5)  | C16—N11—C15—C10 | -176.6 (4) |
| C1—C2—C3—C21                | -152.3 (4) | C18—N11—C15—C14 | 165.7 (4)  |
| C1—C2—C3—C22                | 80.2 (5)   | C16—N11—C15—C14 | -1.8 (5)   |
| C2—C3—O4—C12                | 51.4 (5)   | C6—C13—C16—C17  | -3.0 (6)   |
| C21—C3—O4—C12               | 170.8 (4)  | C14—C13—C16—C17 | 179.4 (4)  |
| C22—C3—O4—C12               | -68.0 (4)  | C6—C13—C16—N11  | 178.2 (4)  |
| C12—C5—C6—C13               | 1.6 (6)    | C14—C13—C16—N11 | 0.7 (5)    |
| C20—C5—C6—C13               | 180.0 (4)  | C18—N11—C16—C13 | -166.8 (4) |
| C14—C7—C8—C9                | 0.7 (9)    | C15—N11—C16—C13 | 0.7 (4)    |
| C7—C8—C9—C10                | -0.9 (10)  | C18—N11—C16—C17 | 14.5 (6)   |
| C8—C9—C10—C15               | -0.6 (9)   | C15—N11—C16—C17 | -177.9 (4) |
| C3—O4—C12—C5                | 153.2 (3)  | C13—C16—C17—C12 | 6.6 (6)    |
| C3—O4—C12—C17               | -30.3 (5)  | N11—C16—C17—C12 | -174.9 (4) |
| C6—C5—C12—O4                | 178.9 (4)  | C13—C16—C17—C1  | -168.1 (4) |
| C20—C5—C12—O4               | 0.4 (5)    | N11—C16—C17—C1  | 10.4 (7)   |
| C6—C5—C12—C17               | 2.5 (5)    | O4—C12—C17—C16  | 177.3 (3)  |
| C20—C5—C12—C17              | -175.9 (4) | C5—C12—C17—C16  | -6.5 (5)   |

|                 |            |                 |            |
|-----------------|------------|-----------------|------------|
| C5—C6—C13—C16   | -1.3 (6)   | O4—C12—C17—C1   | -7.3 (5)   |
| C5—C6—C13—C14   | 175.6 (4)  | C5—C12—C17—C1   | 168.9 (4)  |
| C8—C7—C14—C15   | 1.0 (7)    | C2—C1—C17—C16   | -164.2 (4) |
| C8—C7—C14—C13   | -178.8 (5) | C2—C1—C17—C12   | 21.1 (6)   |
| C16—C13—C14—C7  | 178.1 (5)  | C15—N11—C18—O19 | 17.5 (7)   |
| C6—C13—C14—C7   | 0.9 (8)    | C16—N11—C18—O19 | -177.2 (4) |
| C16—C13—C14—C15 | -1.7 (5)   | O4—C3—C22—C23   | -54.7 (6)  |
| C6—C13—C14—C15  | -178.9 (4) | C2—C3—C22—C23   | -172.6 (5) |
| C9—C10—C15—C14  | 2.3 (7)    | C21—C3—C22—C23  | 60.7 (6)   |
| C9—C10—C15—N11  | 176.4 (5)  | C3—C22—C23—C24  | 169.6 (5)  |
| C7—C14—C15—C10  | -2.5 (7)   | C22—C23—C24—C25 | 95.4 (8)   |
| C13—C14—C15—C10 | 177.3 (4)  | C23—C24—C25—C27 | -0.5 (10)  |
| C7—C14—C15—N11  | -177.7 (4) | C23—C24—C25—C26 | -178.6 (5) |
| C13—C14—C15—N11 | 2.2 (5)    |                 |            |



Figure S1: <sup>1</sup>H NMR spectrum of compound Mahanimbine (1) (CDCl<sub>3</sub>, 400 MHz)

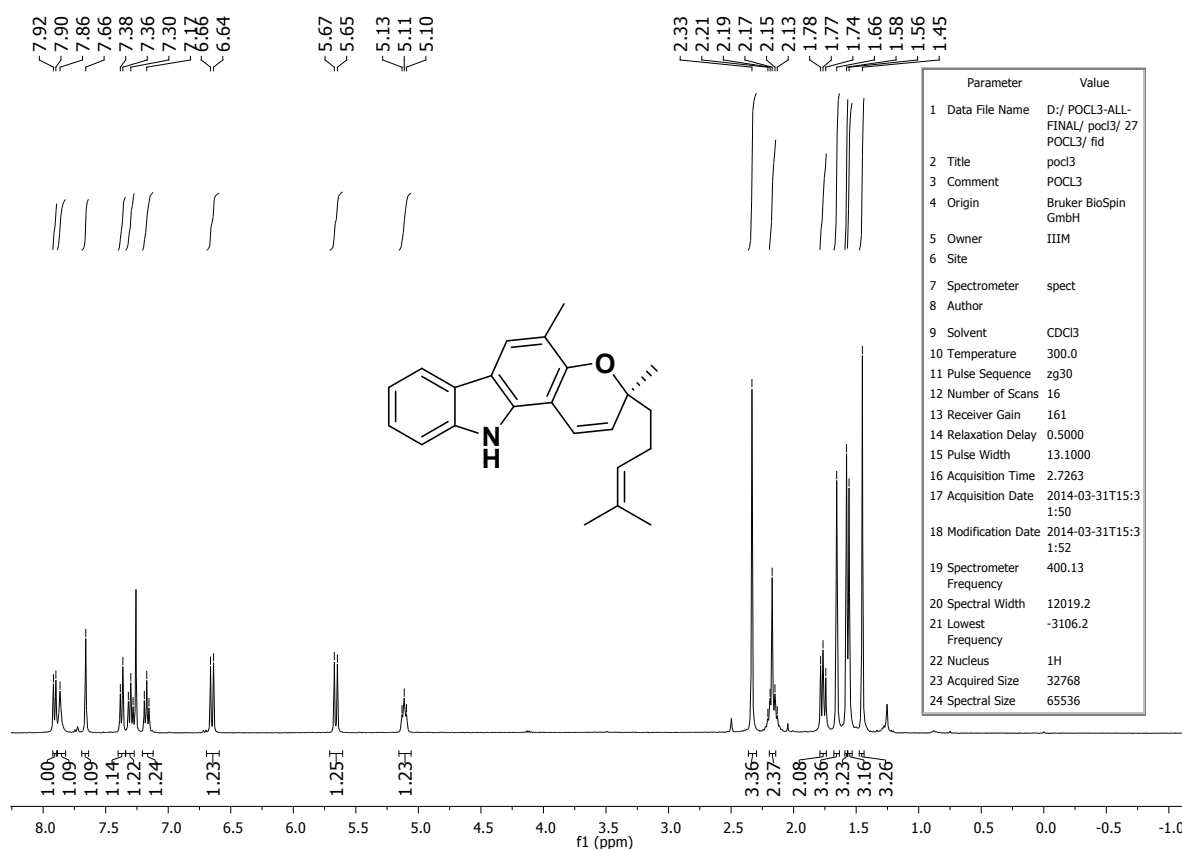

Figure S2: <sup>1</sup>H NMR spectrum of Isocyclomahanimbine (2) (CDCl<sub>3</sub>, 400 MHz)

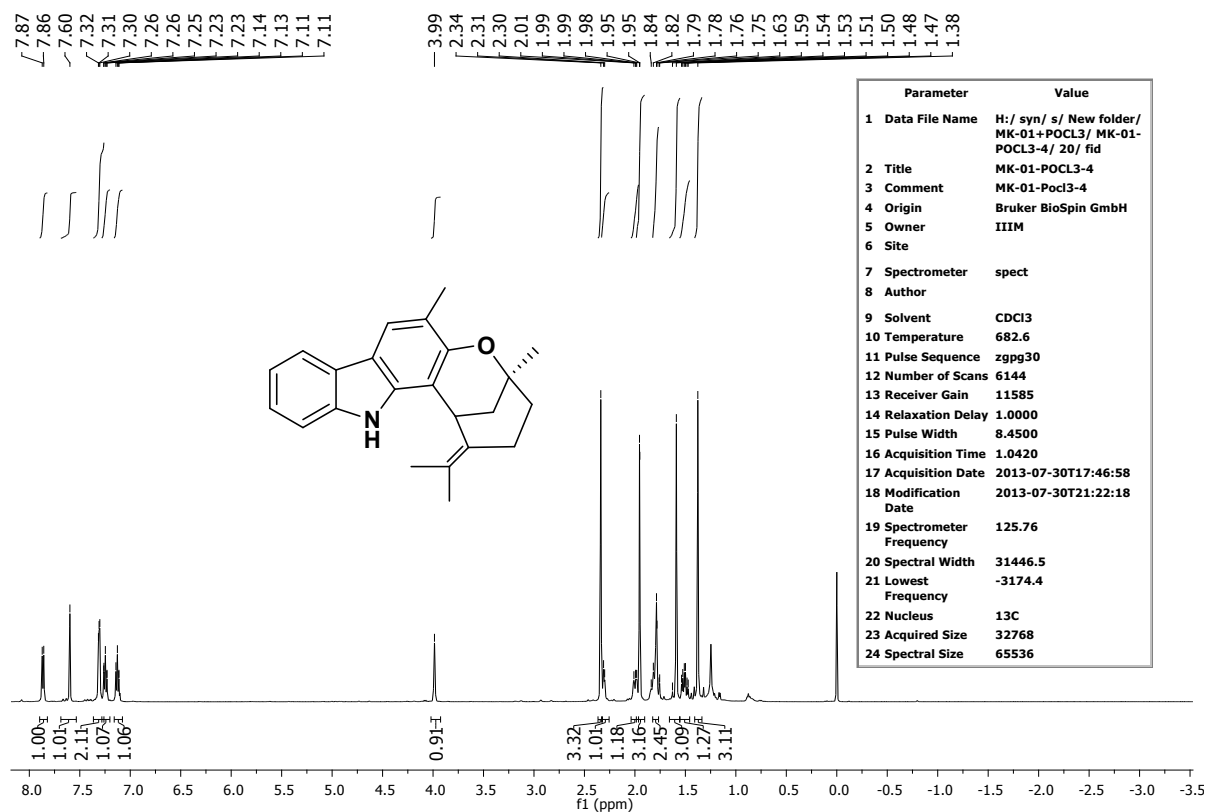

Figure S3:  $^{13}\text{C}$  NMR spectrum of Isocyclomahanimbine (**2**) ( $\text{CDCl}_3$ , 125 MHz)

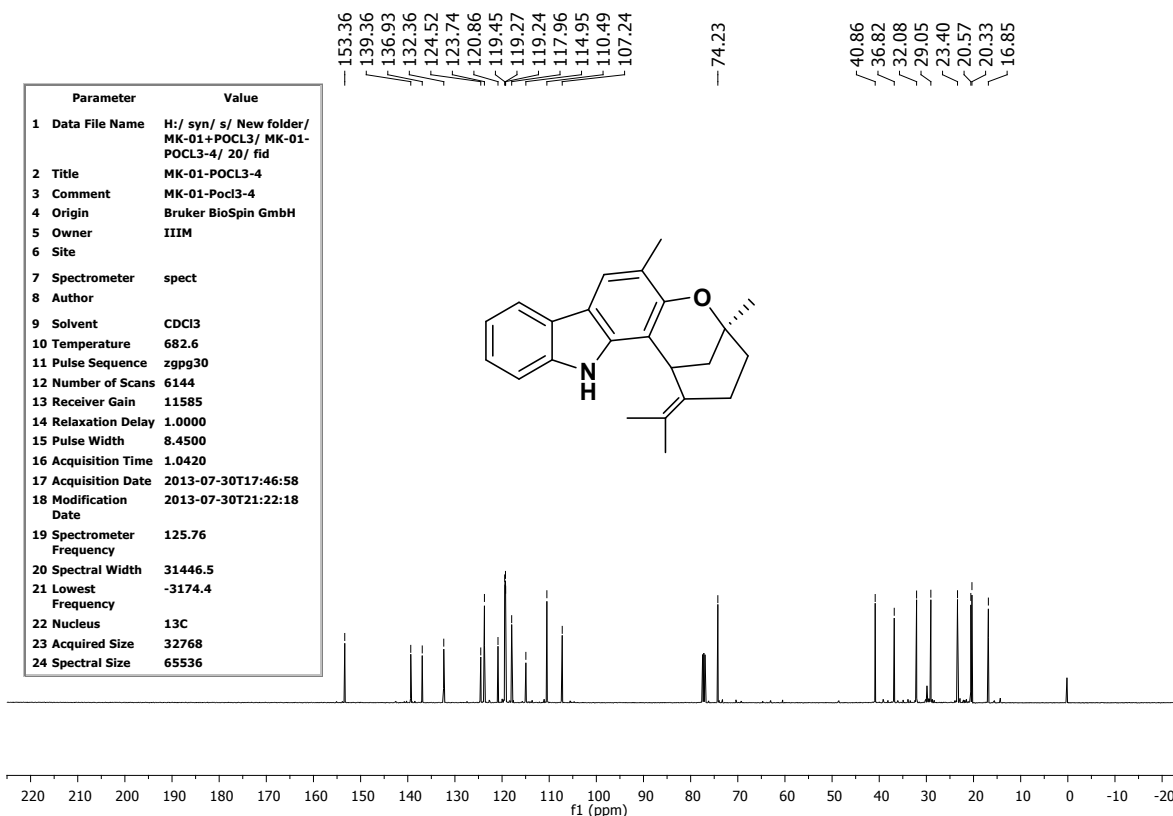

Figure S4:  $^1\text{H}$  NMR spectrum of Curryanin (**3**) ( $\text{CDCl}_3$ , 500 MHz)

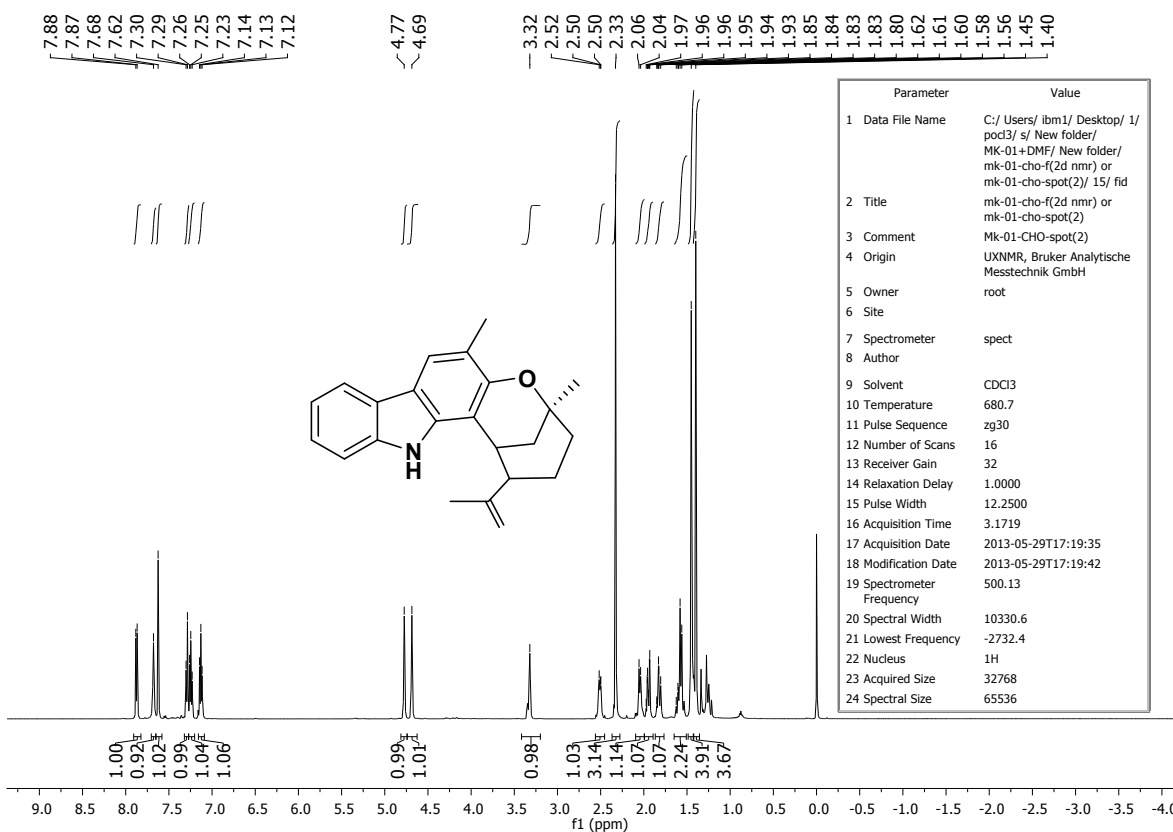

Figure S5:  $^{13}\text{C}$  NMR spectrum of Curryanin (**3**) ( $\text{CDCl}_3$ , 125 MHz)

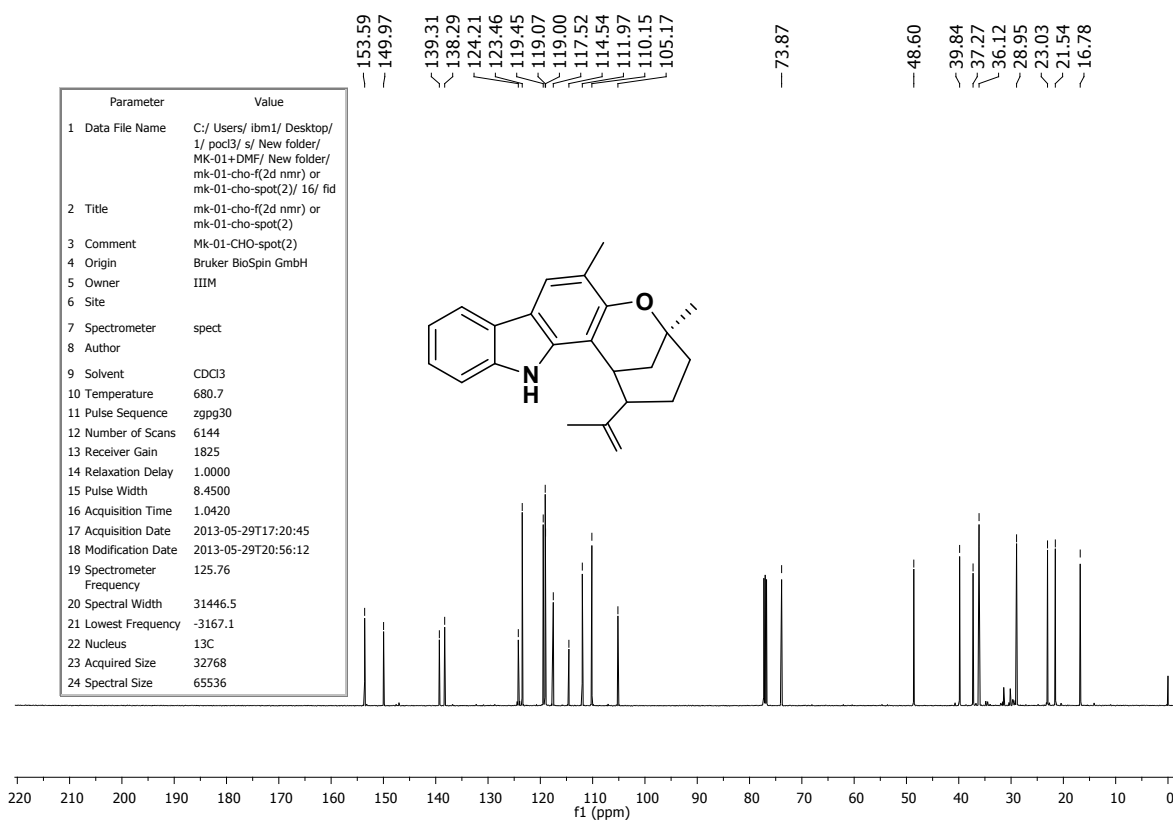

Figure S6:  $^1\text{H}$  NMR spectrum of Bicyclomahanimbine (**4**), ( $\text{CDCl}_3$ , 500 MHz)

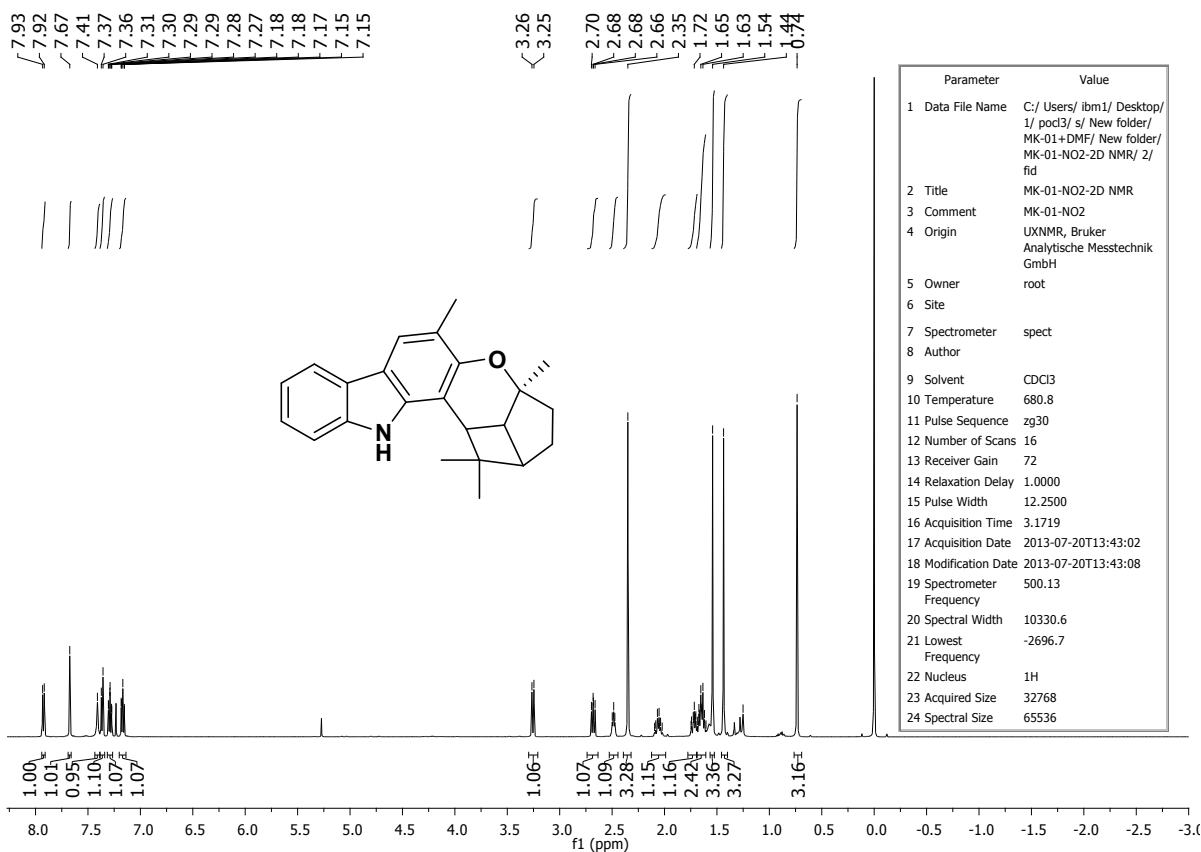

Figure S7:  $^{13}\text{C}$  NMR spectrum of Bicyclomahanimbine (4), ( $\text{CDCl}_3$ , 125 MHz)

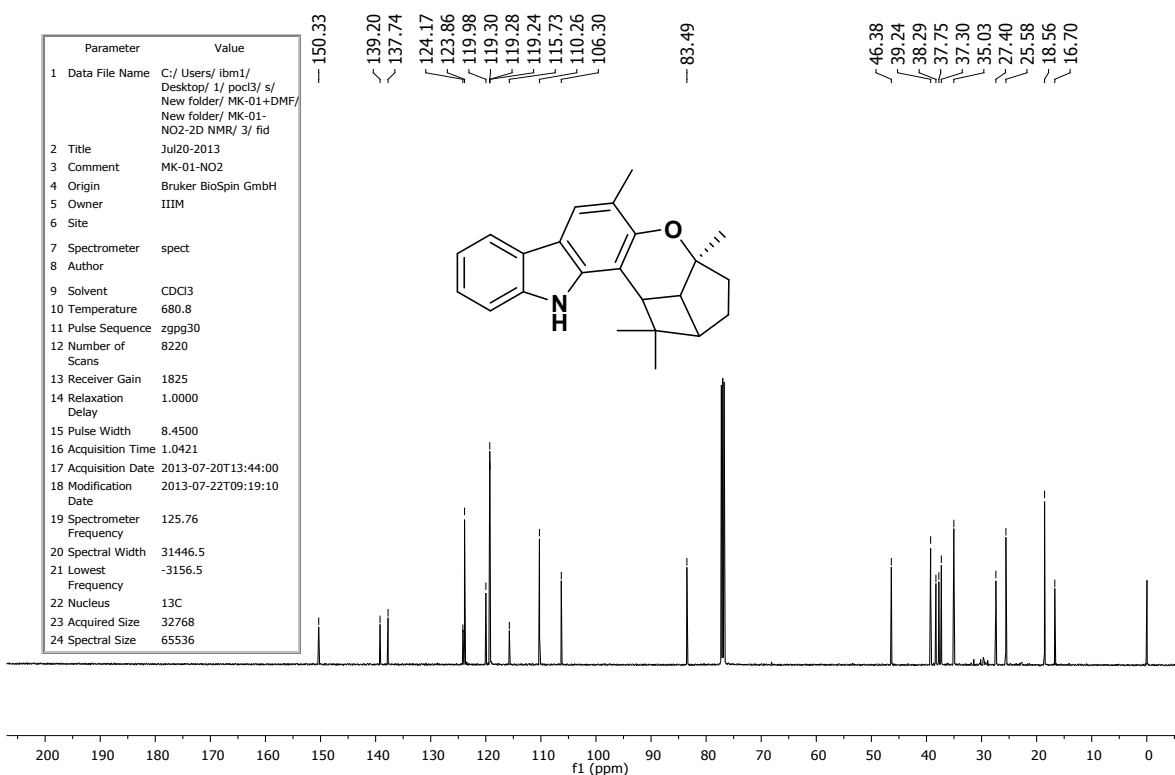

Figure S7: HRESIMS spectroscopic data of compound 5

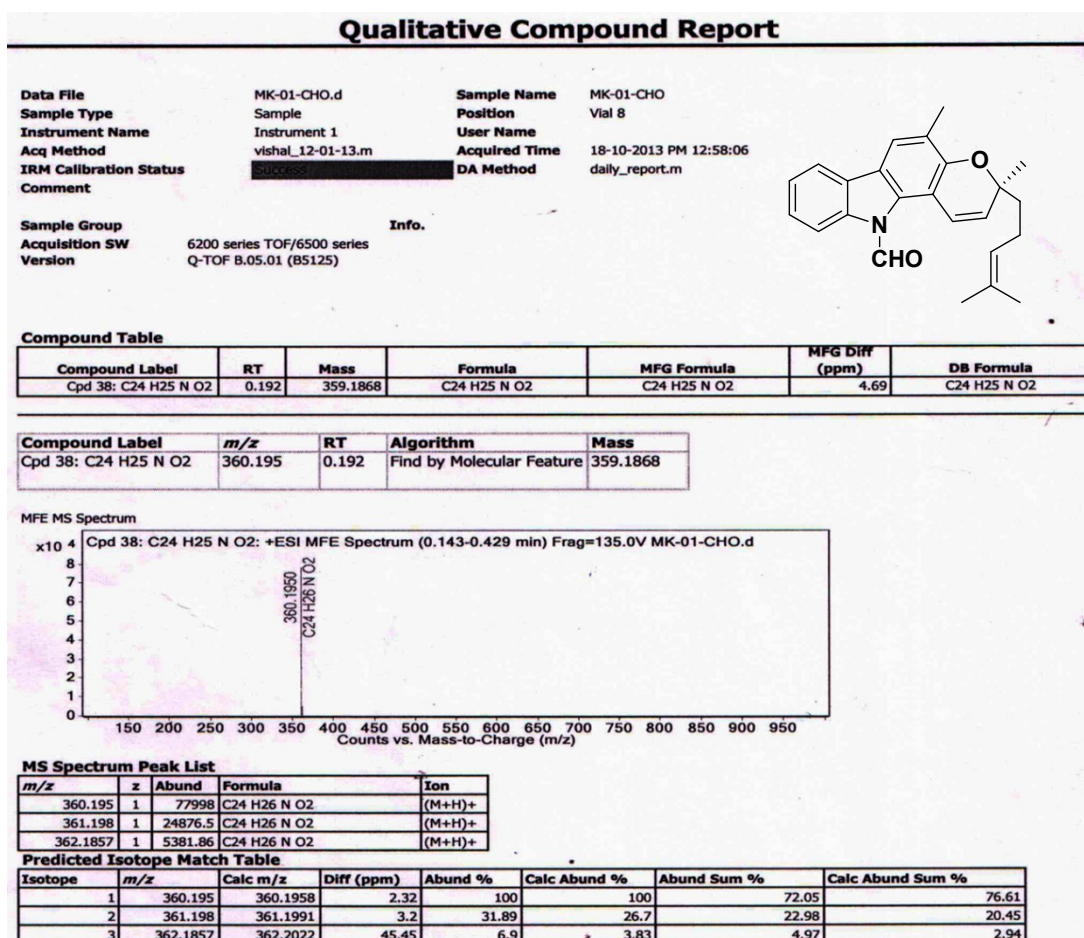

Figure S8:  $^1\text{H}$  NMR spectrum of compound **5** ( $\text{CDCl}_3$ , 400 MHz)

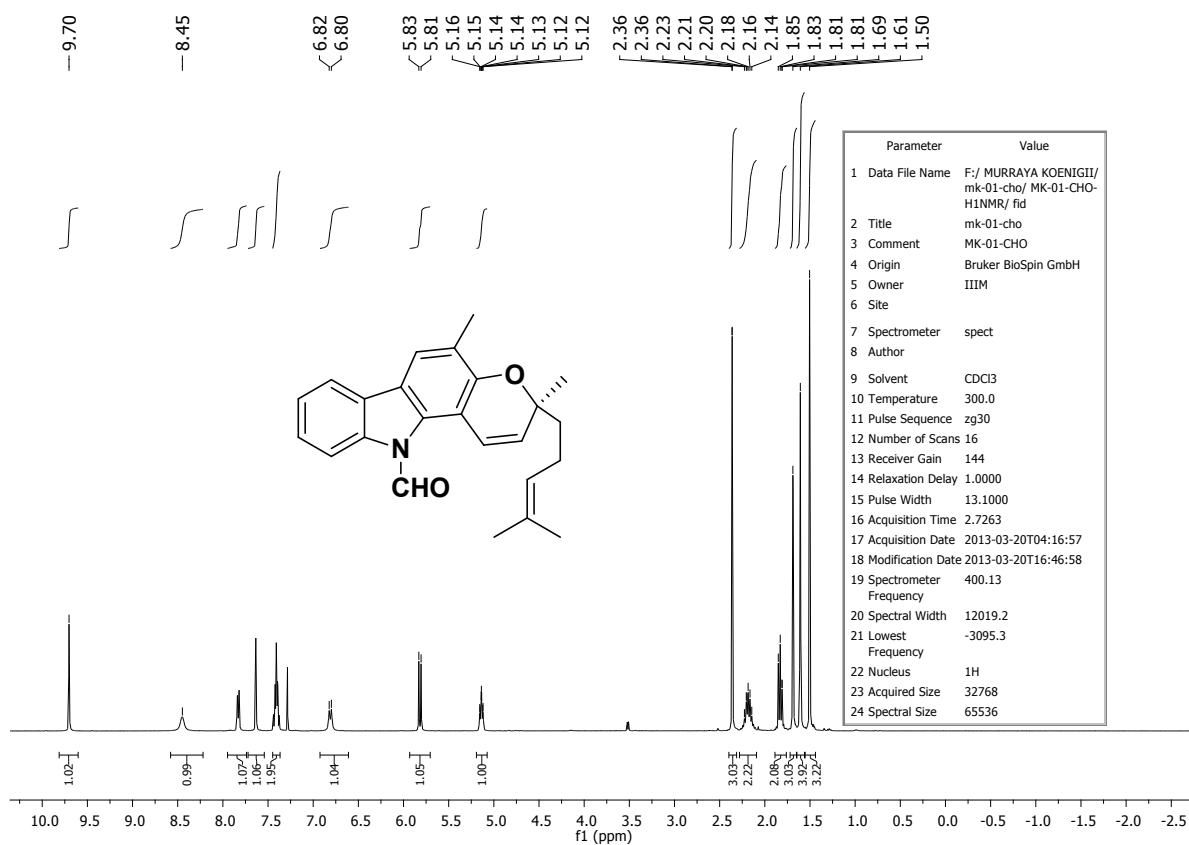

Figure S9:  $^{13}\text{C}$  NMR spectrum of compound **5** ( $\text{CDCl}_3$ , 100 MHz)

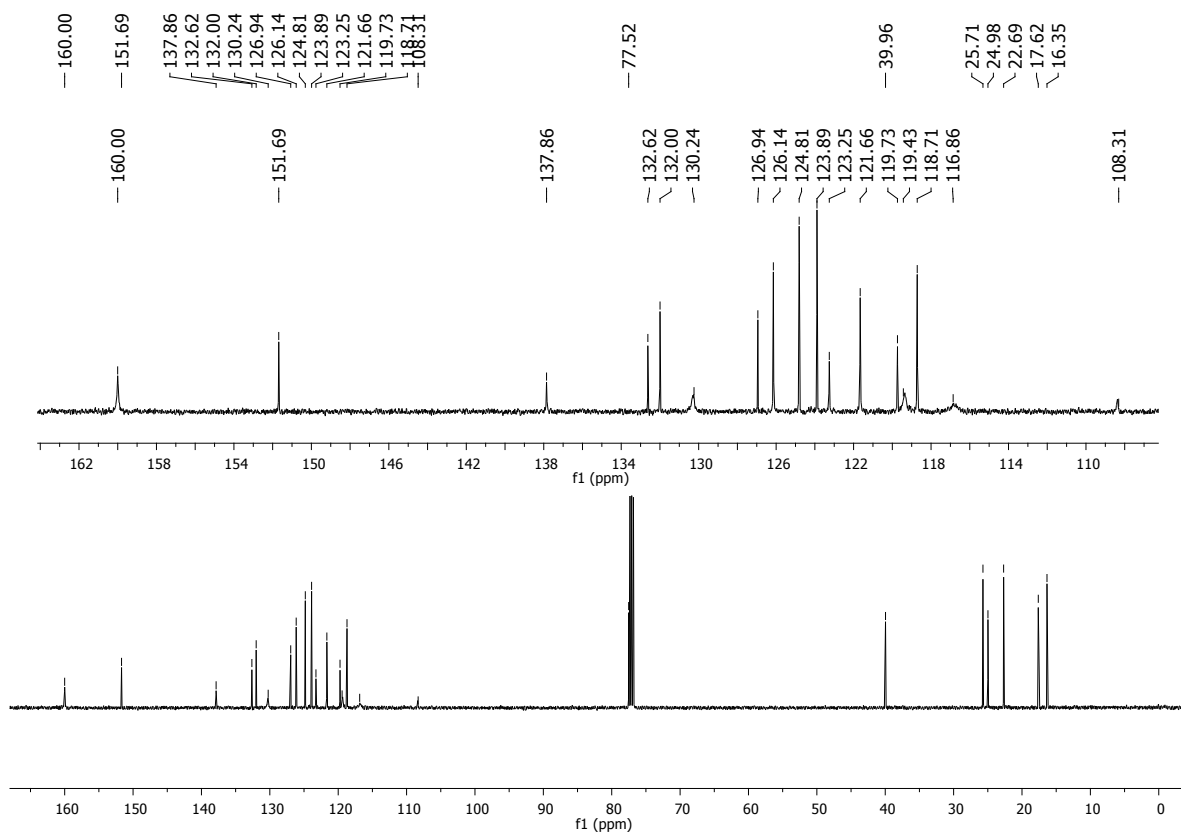

Figure S10: DEPT-135 spectrum of compound 5

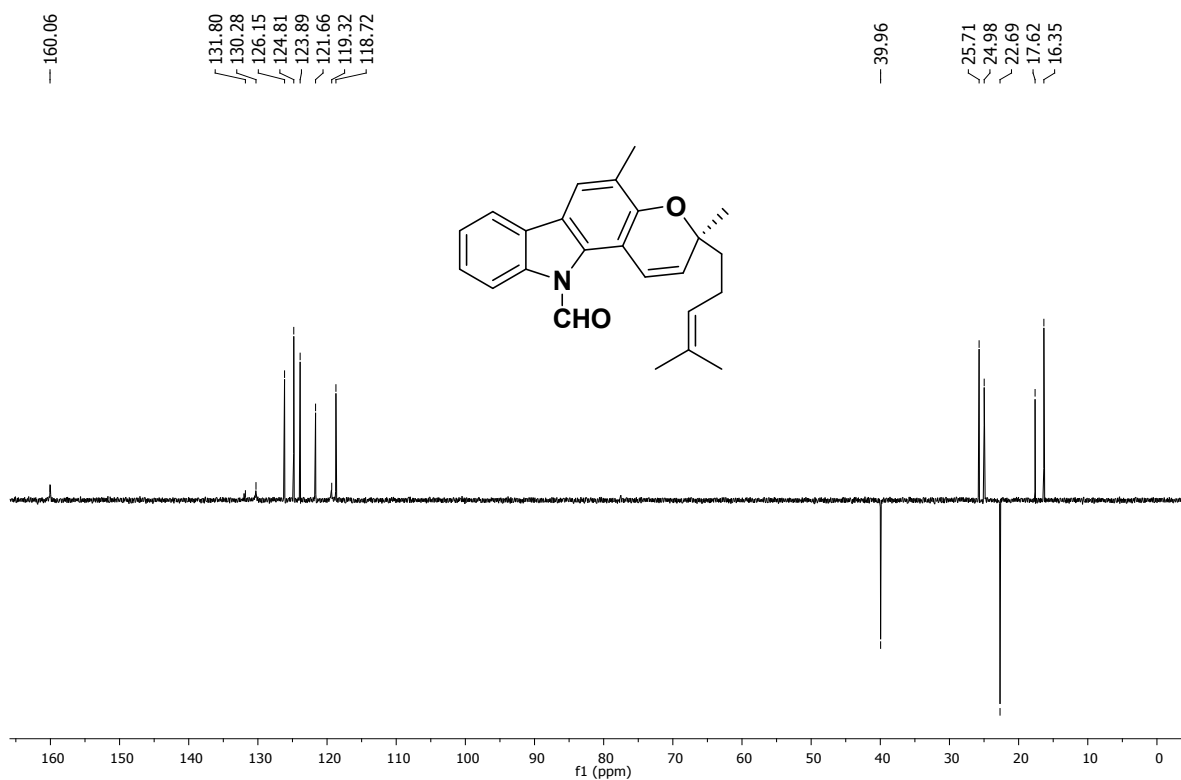

Figure S11: HRESIMS spectroscopic data of compound 6

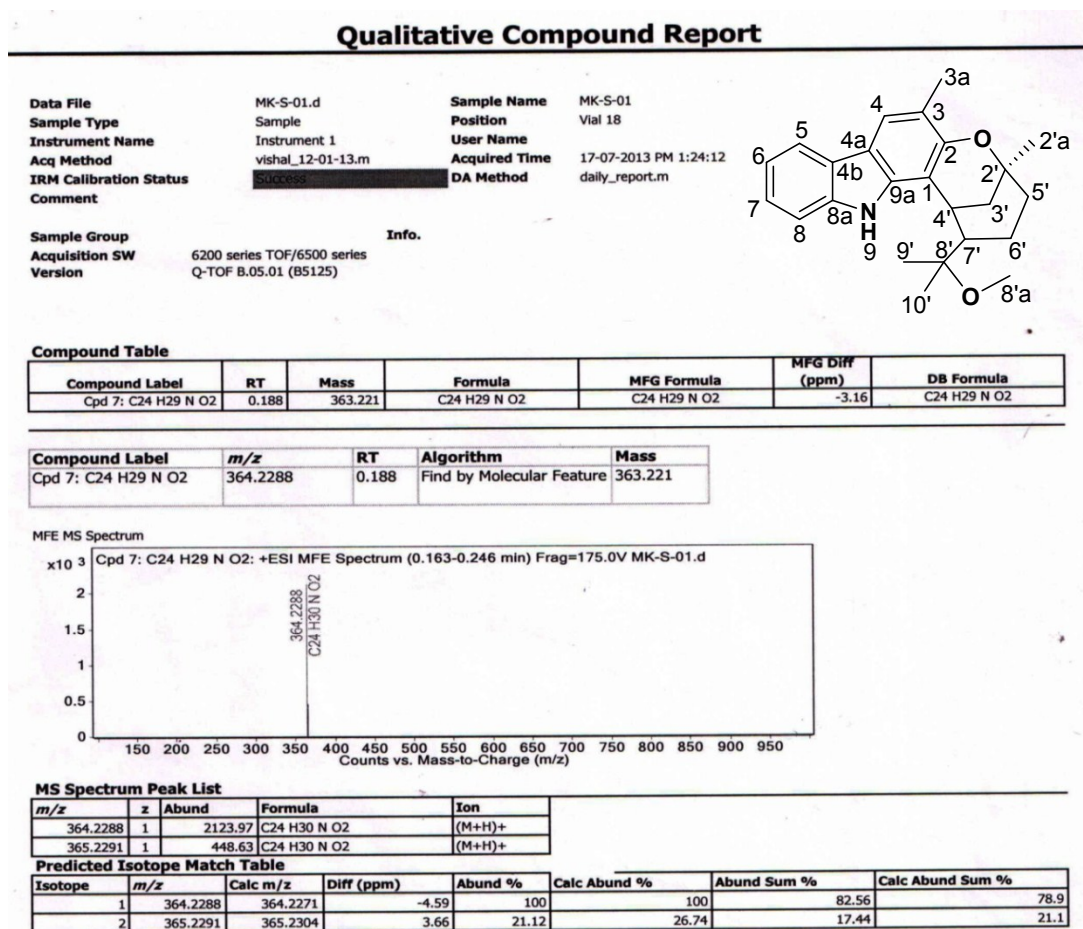

Figure S13:  $^1\text{H}$  NMR spectrum of compound **6** ( $\text{CDCl}_3$ , 500 MHz)

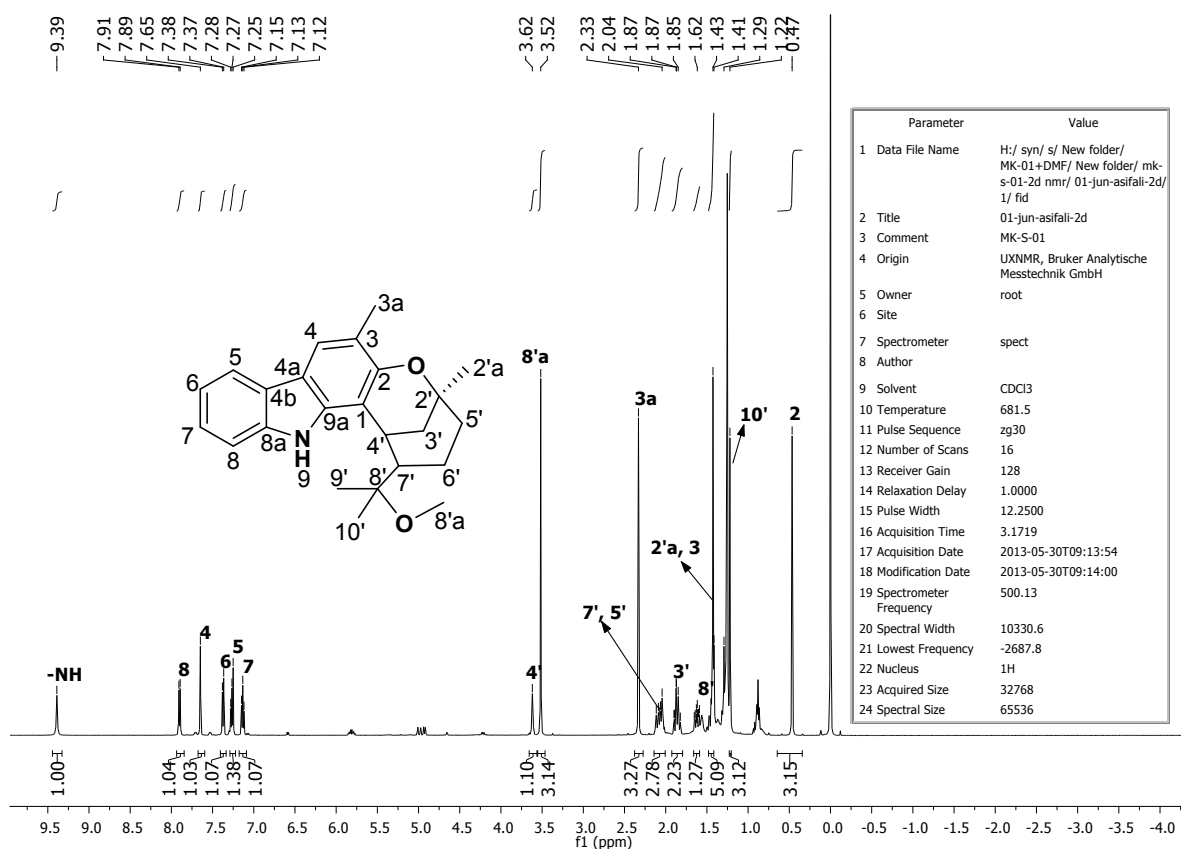

Figure S14: S19.  $^{13}\text{C}$  NMR spectrum of compound **6** ( $\text{CDCl}_3$ , 125 MHz)

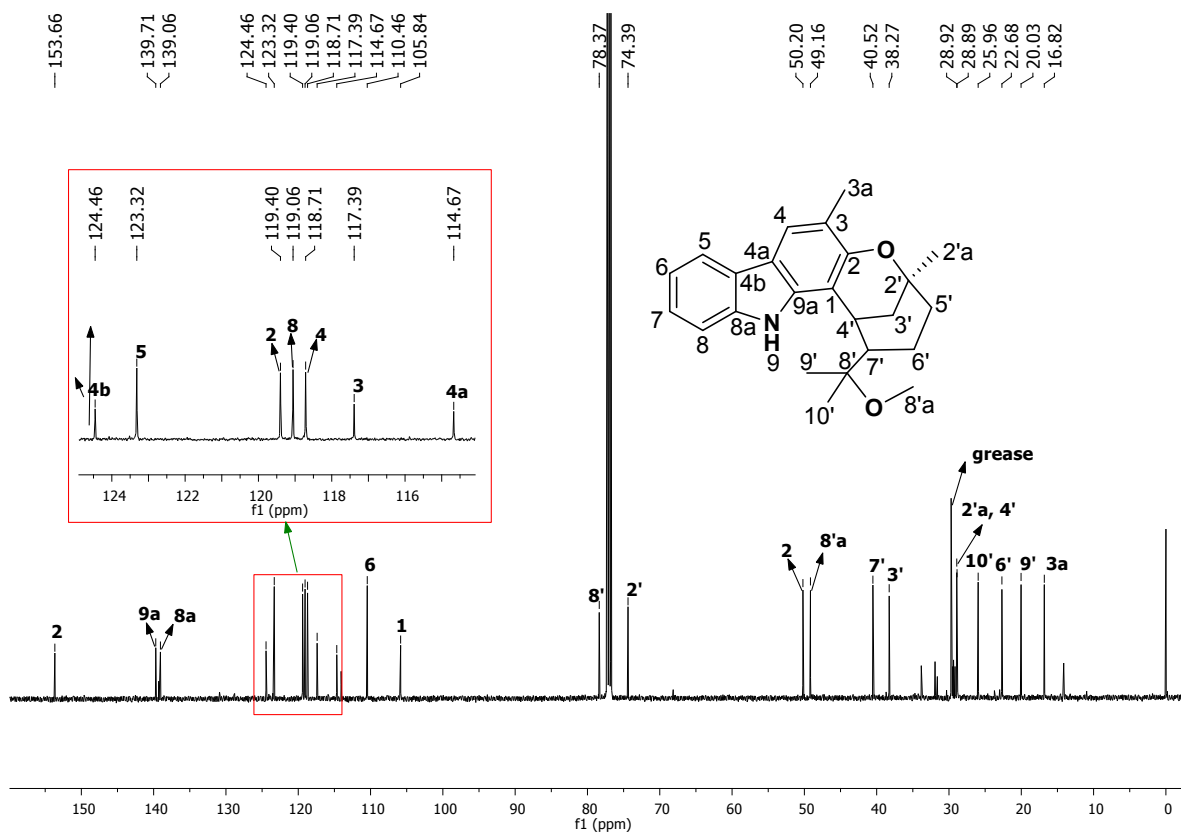

Figure S15: DEPT-135 spectrum of compound **6** (CDCl<sub>3</sub>, 125 MHz)

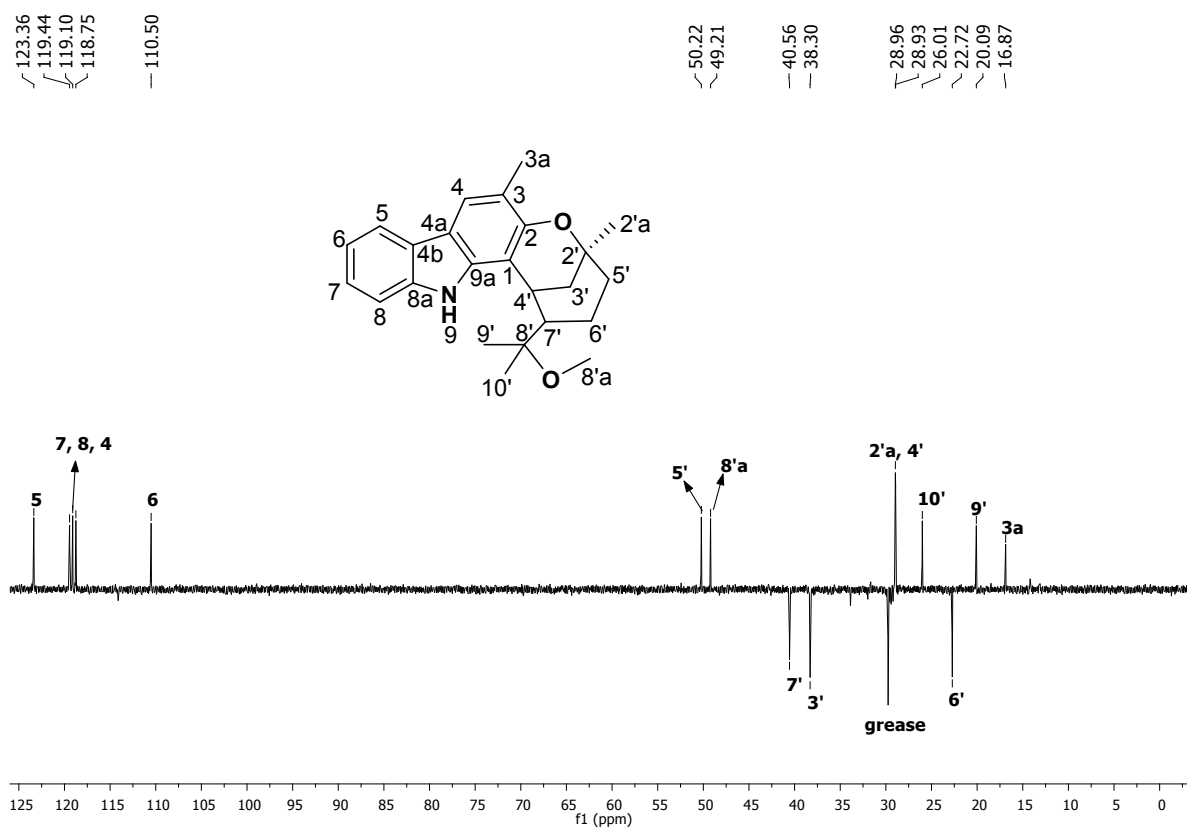

Figure S16: HSQC spectrum of compound **6** (CDCl<sub>3</sub>, 125 MHz)

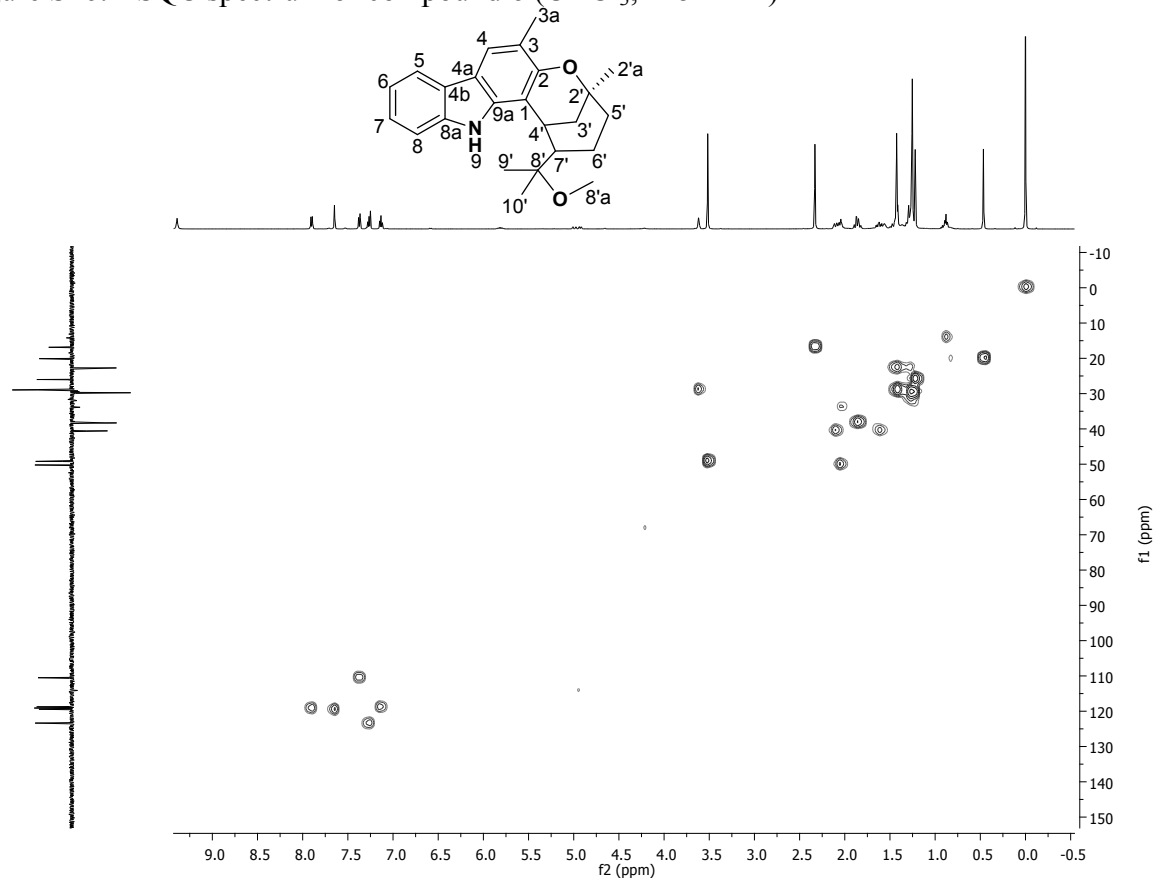



Figure S17: S22. COSY spectrum of compound **6**

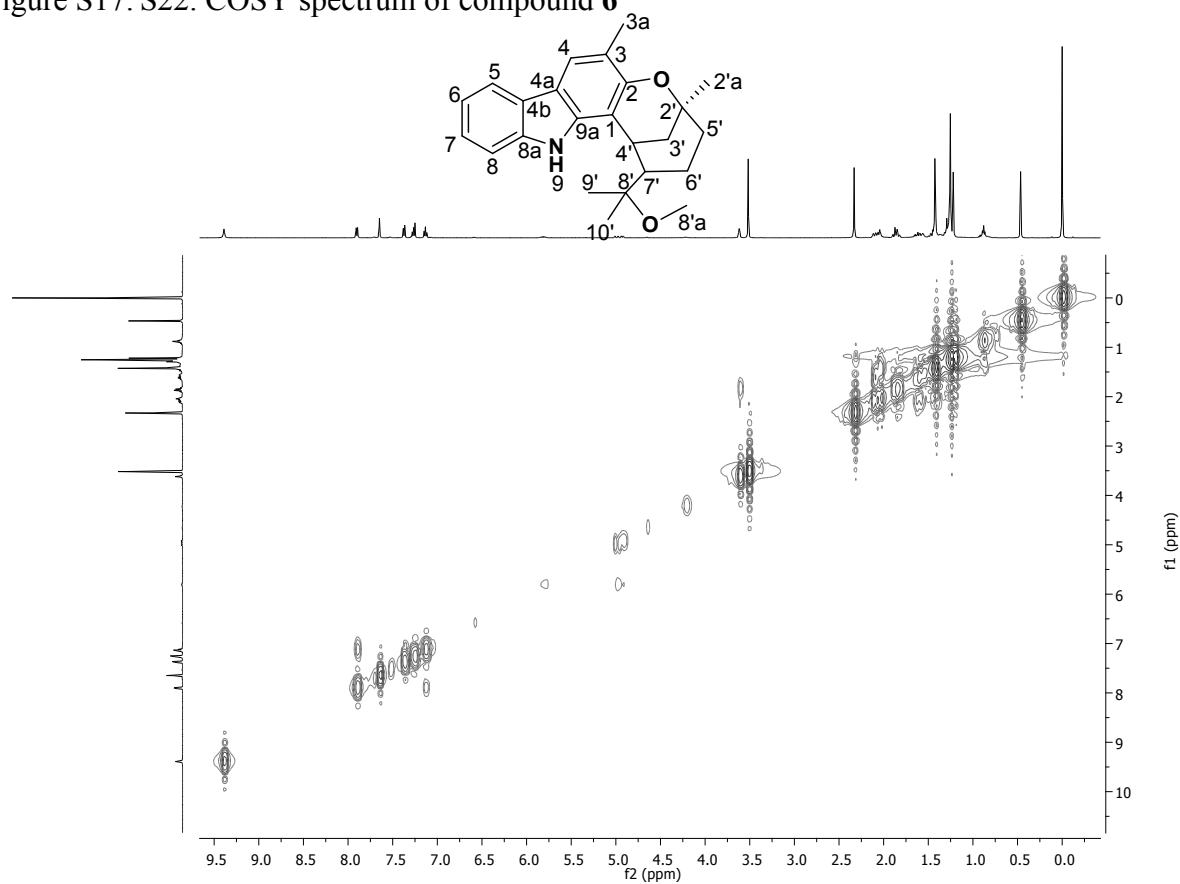

Figure S18: HMBC spectrum of compound **6**

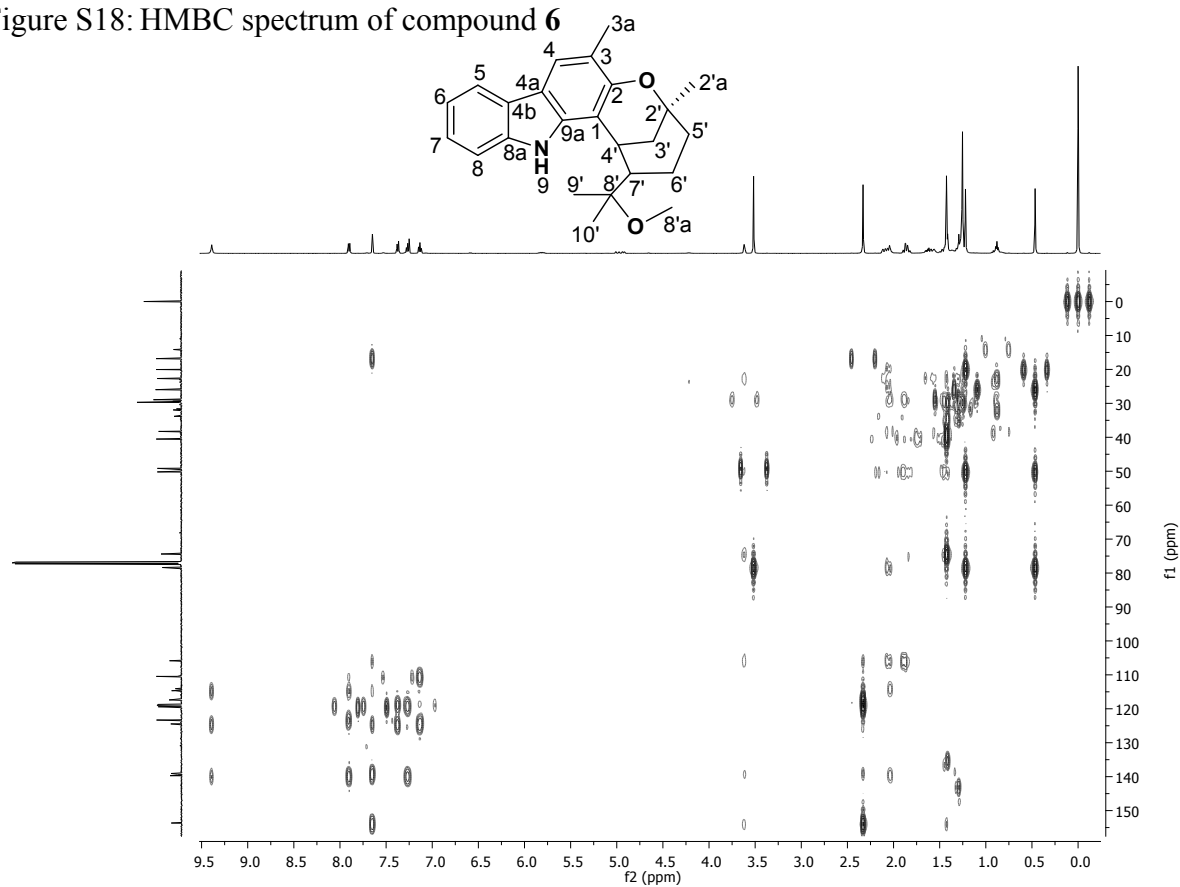

Figure S19:  $^1\text{H}$  NMR spectrum of Curryangin (7) ( $\text{CDCl}_3$ , 500 MHz)

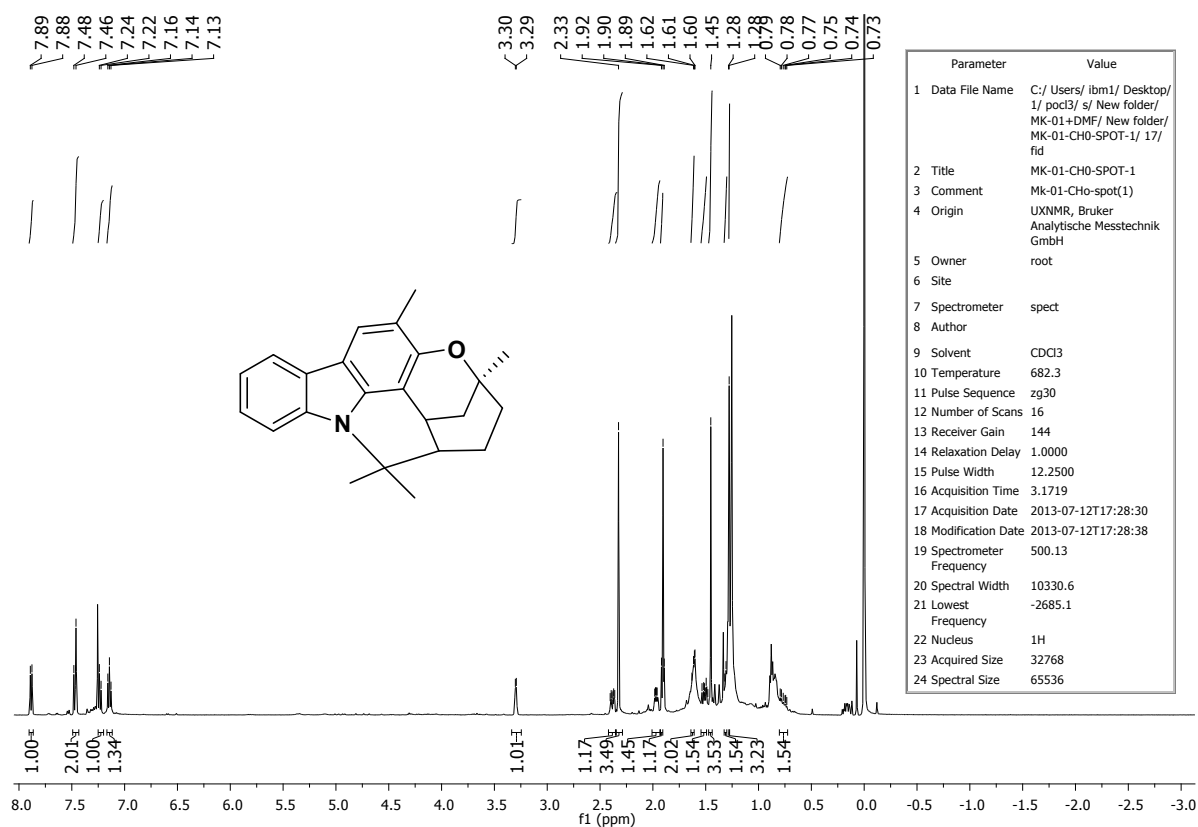

Figure S20:  $^{13}\text{C}$  NMR spectrum of Curryangin (7) ( $\text{CDCl}_3$ , 125 MHz)

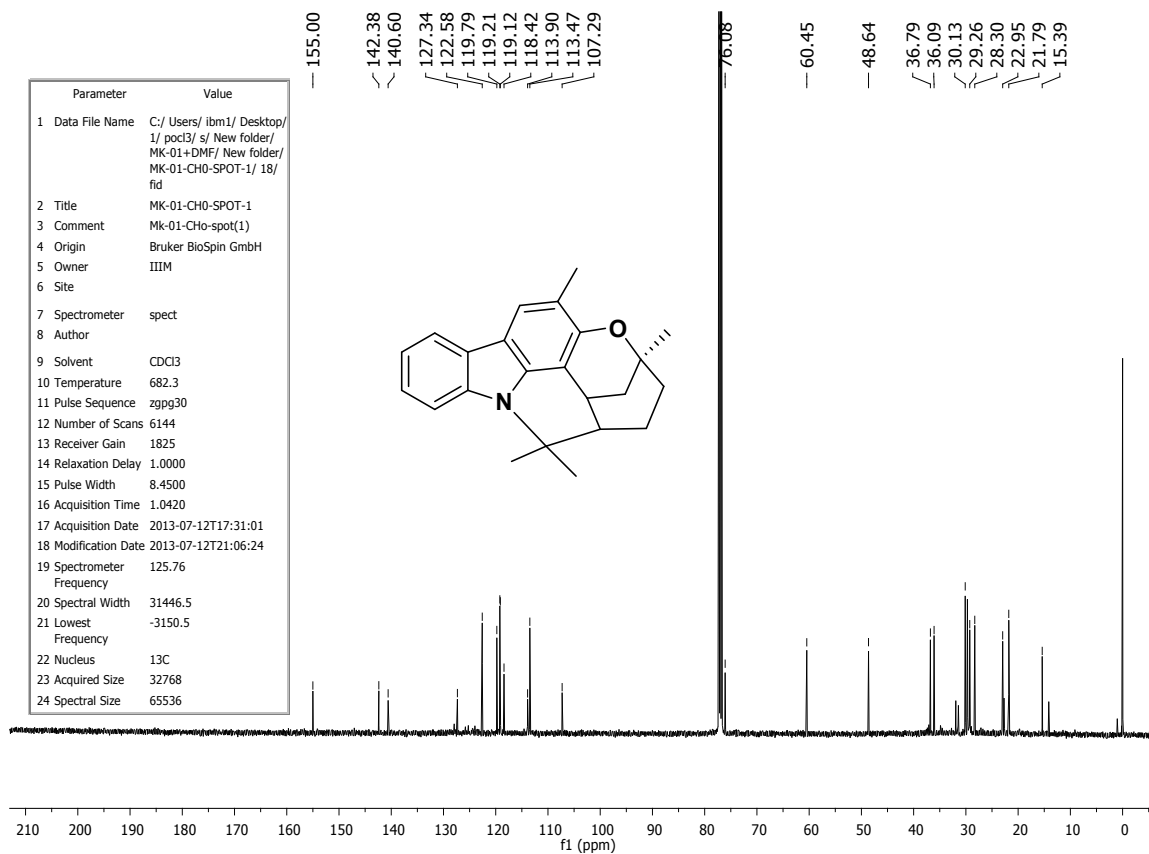

Figure S21: HRESIMS spectroscopic data of compound 8

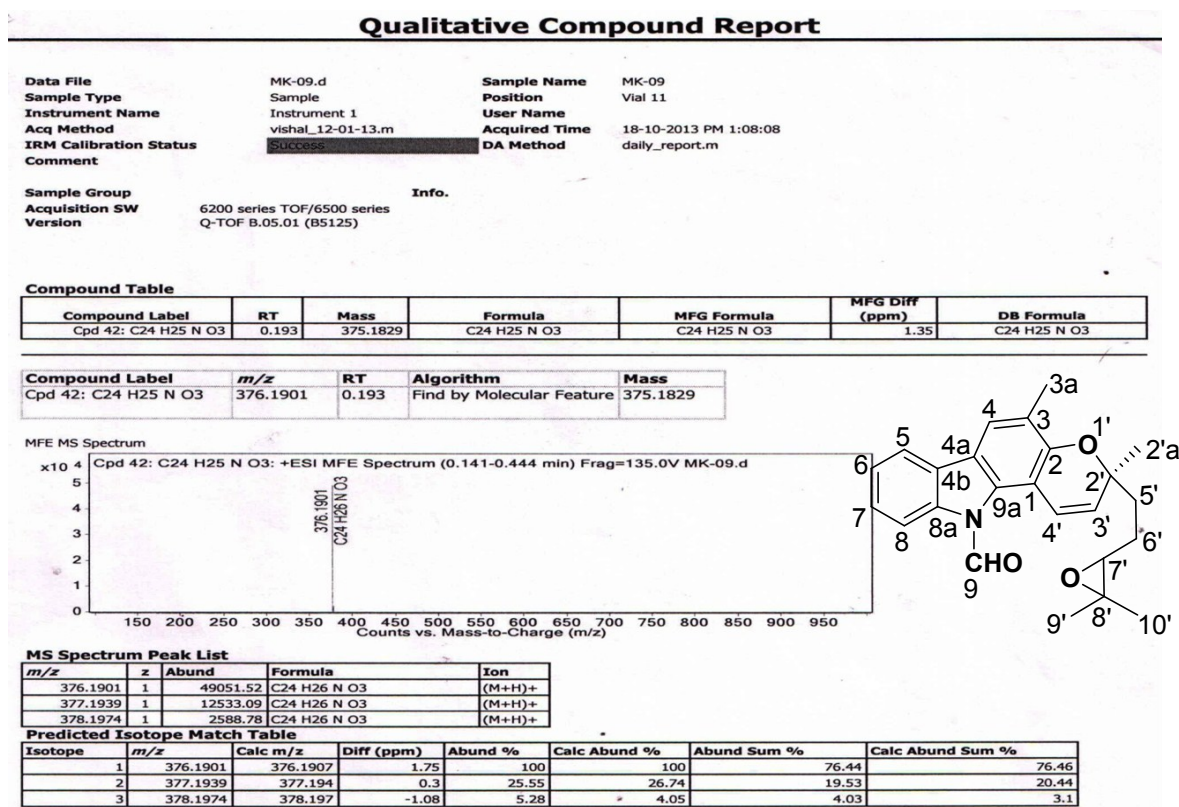

Figure S22: <sup>1</sup>H NMR spectrum of compound 8 (CDCl<sub>3</sub>, 400 MHz)

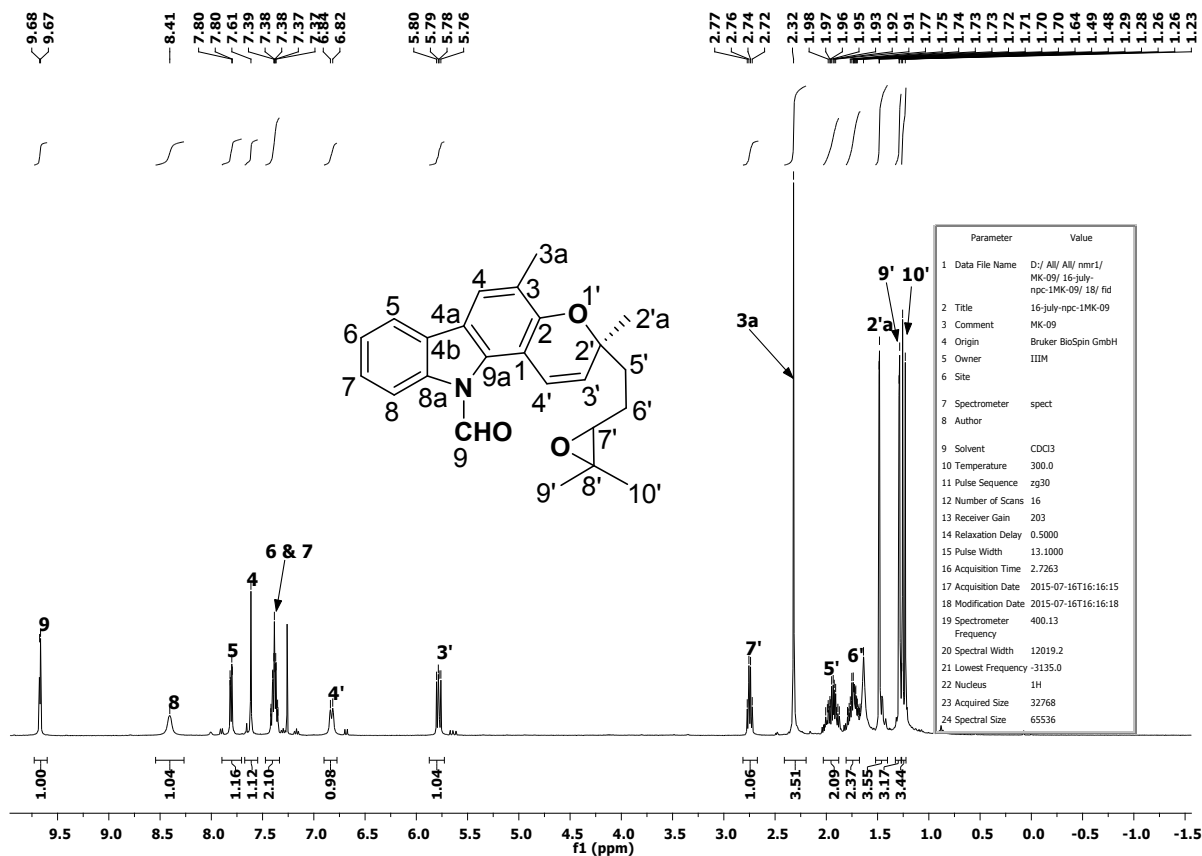

Figure S23:  $^{13}\text{C}$  NMR spectrum of compound **8** ( $\text{CDCl}_3$ , 125 MHz)

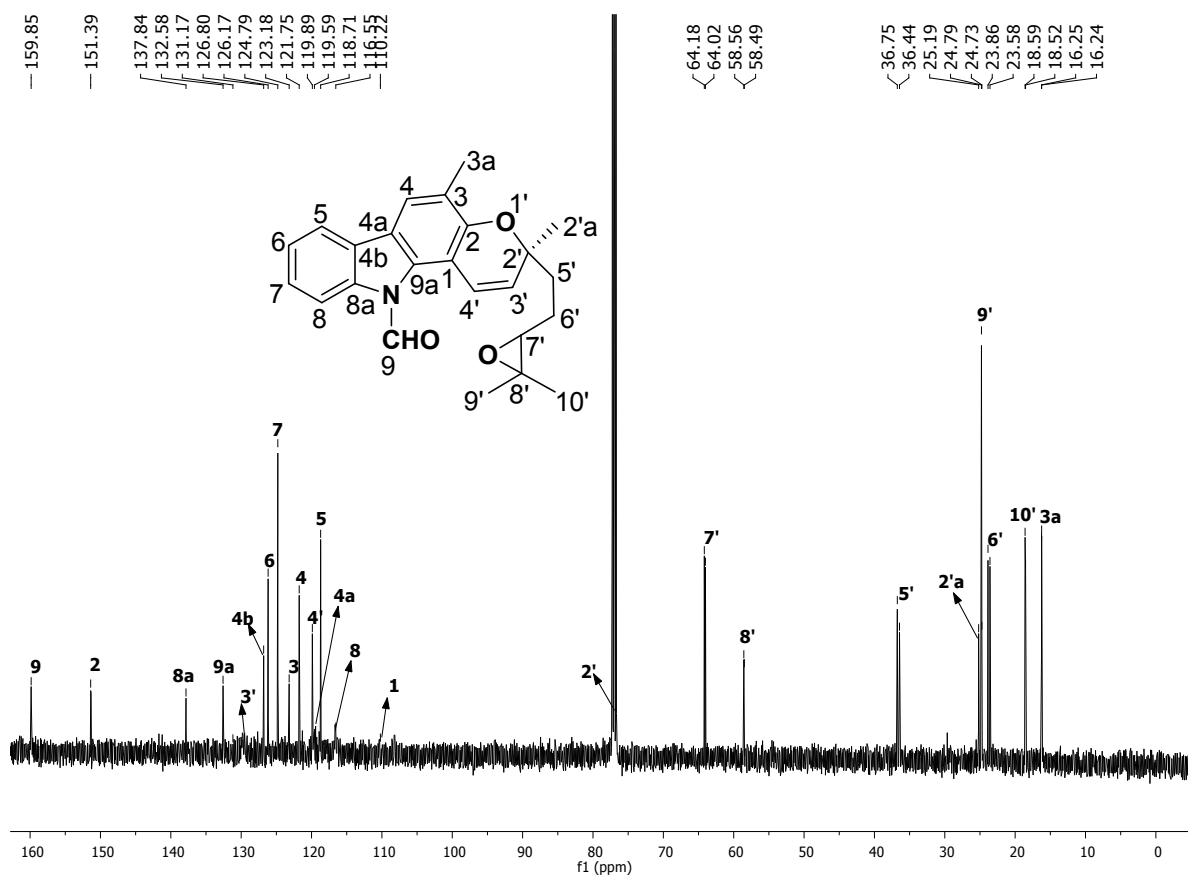

Figure S24: DEPT-135 spectrum of compound **8**

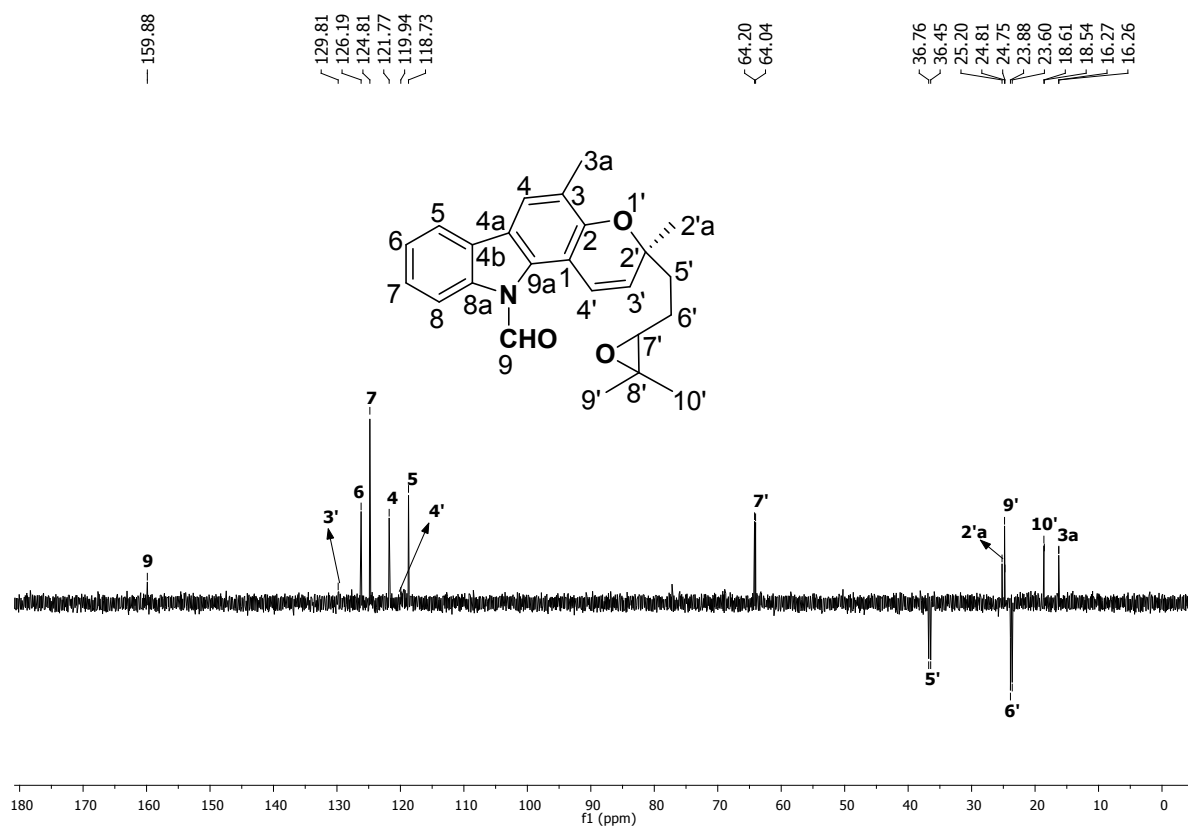

Figure S25: HSQC spectrum of compound **8**

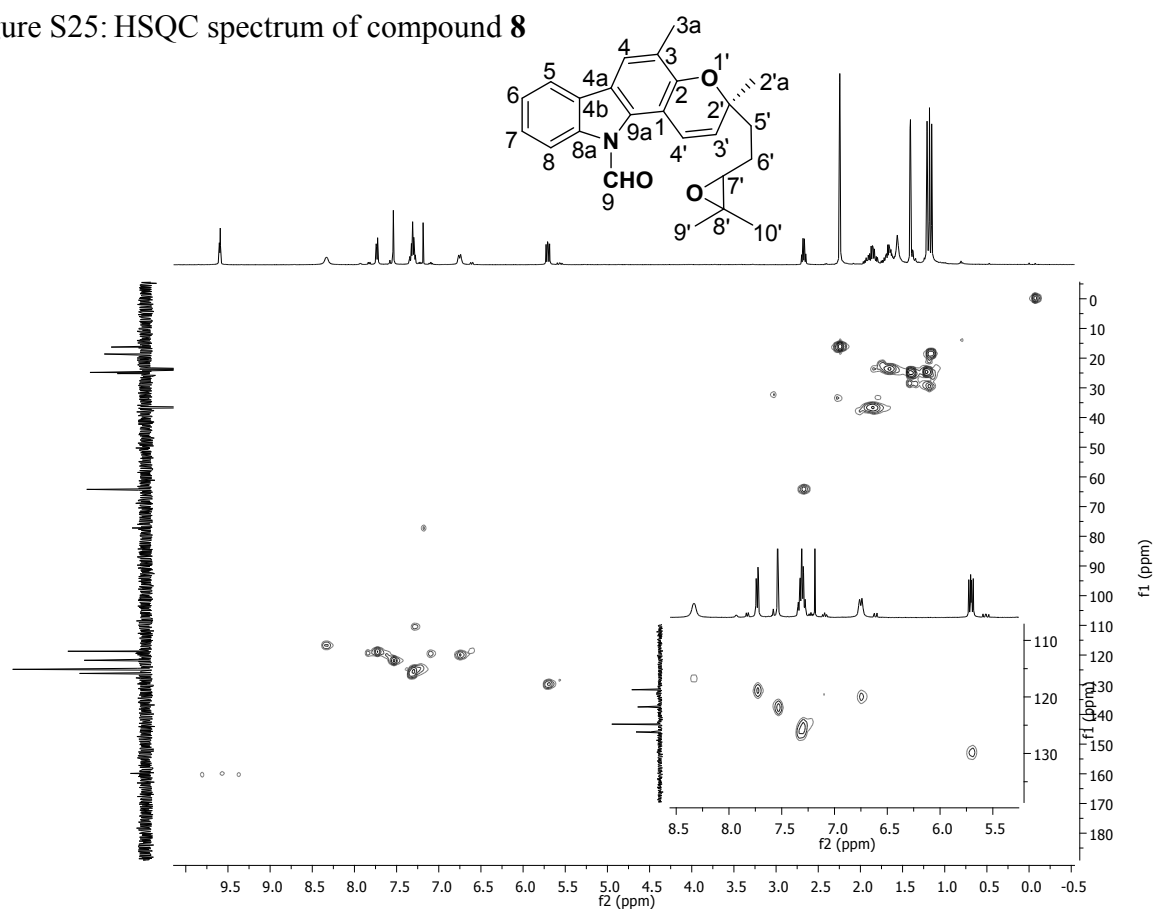

Figure S26: COSY spectrum of compound **8**

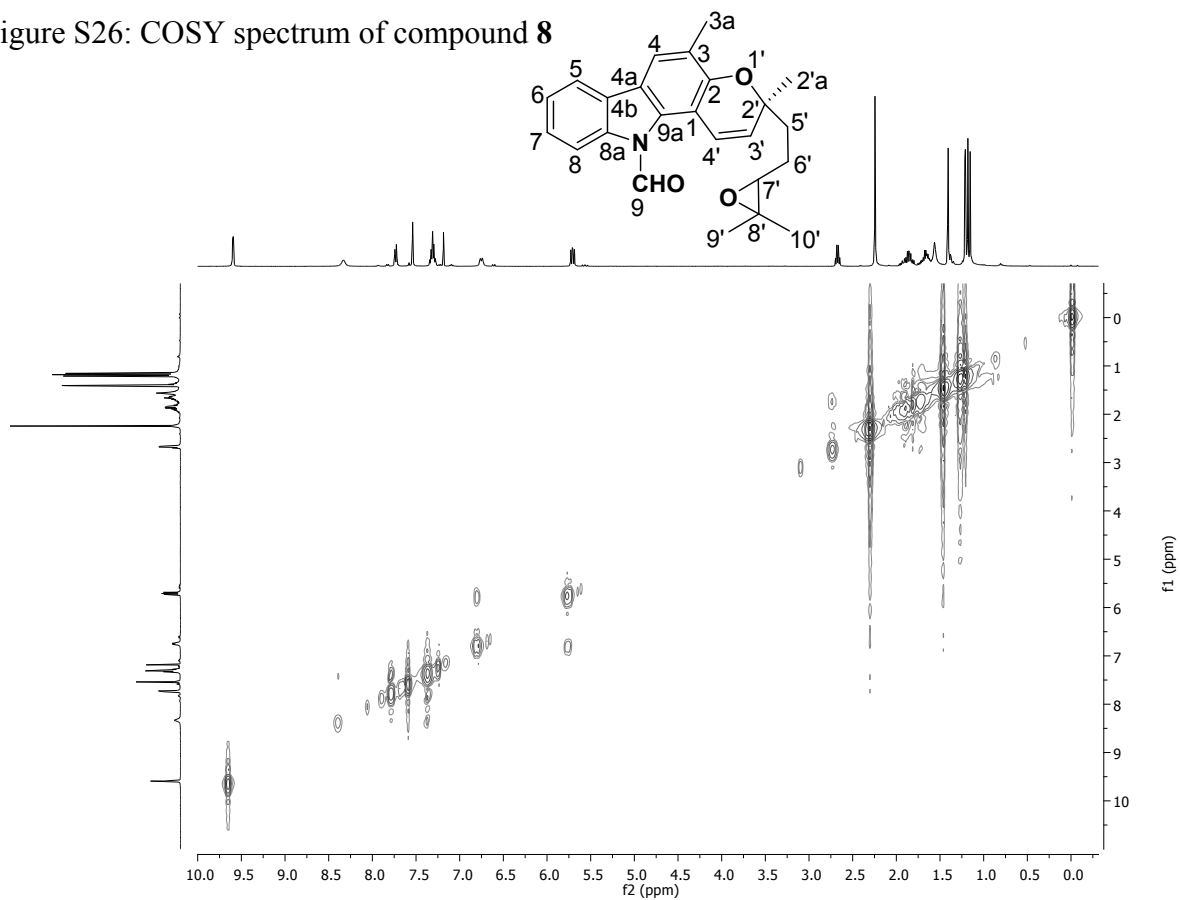

Figure S27: HMBC spectrum of compound **8**

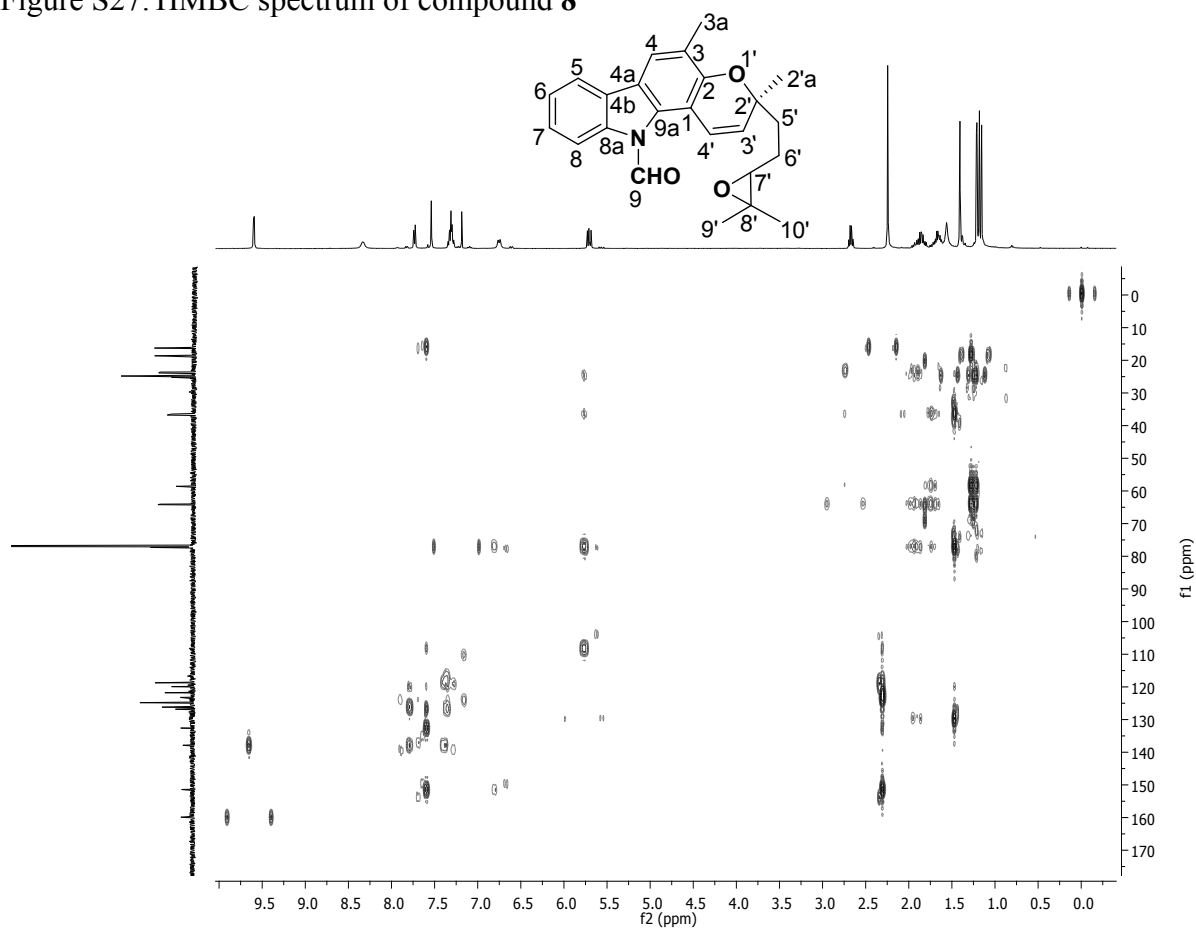

Figure S28:  $^1\text{H}$  NMR spectrum of Murrayazoline (**9**) ( $\text{CDCl}_3$ , 400 MHz)

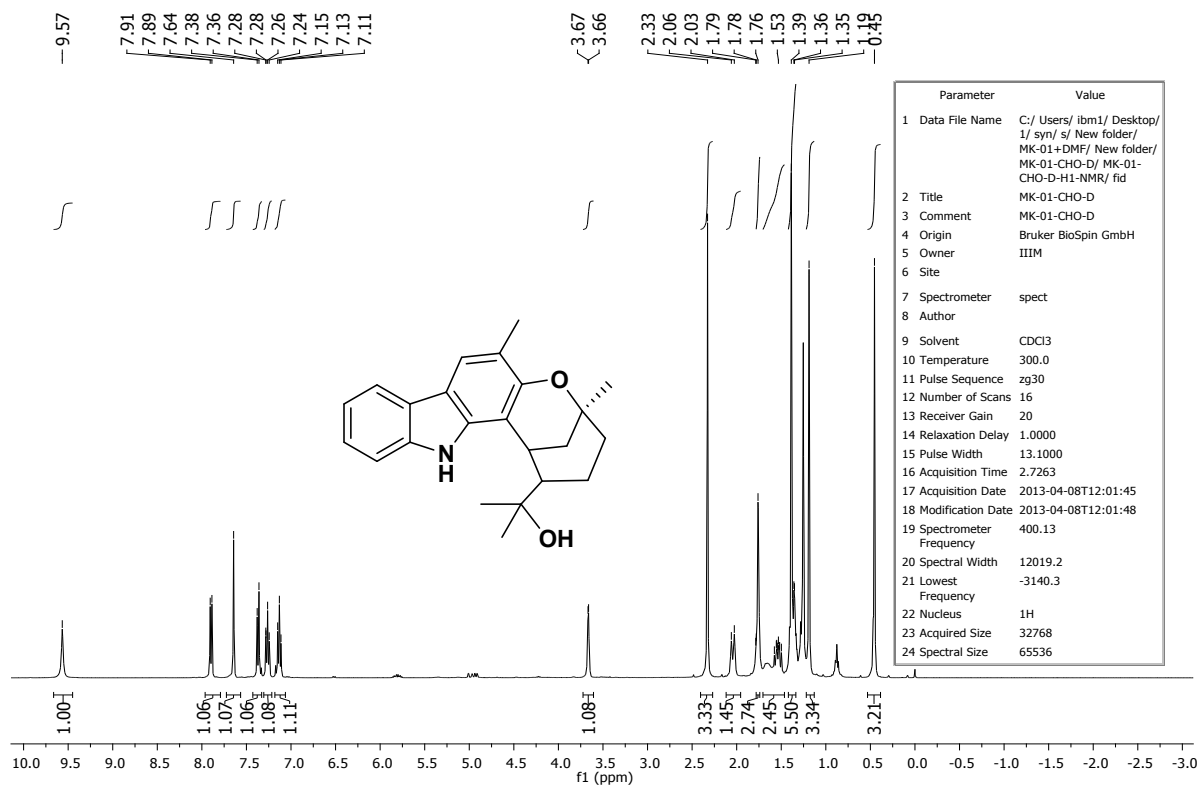

Figure S29:  $^{13}\text{C}$  NMR spectrum of Murrayazolinine (**9**) ( $\text{CDCl}_3$ , 125 MHz)

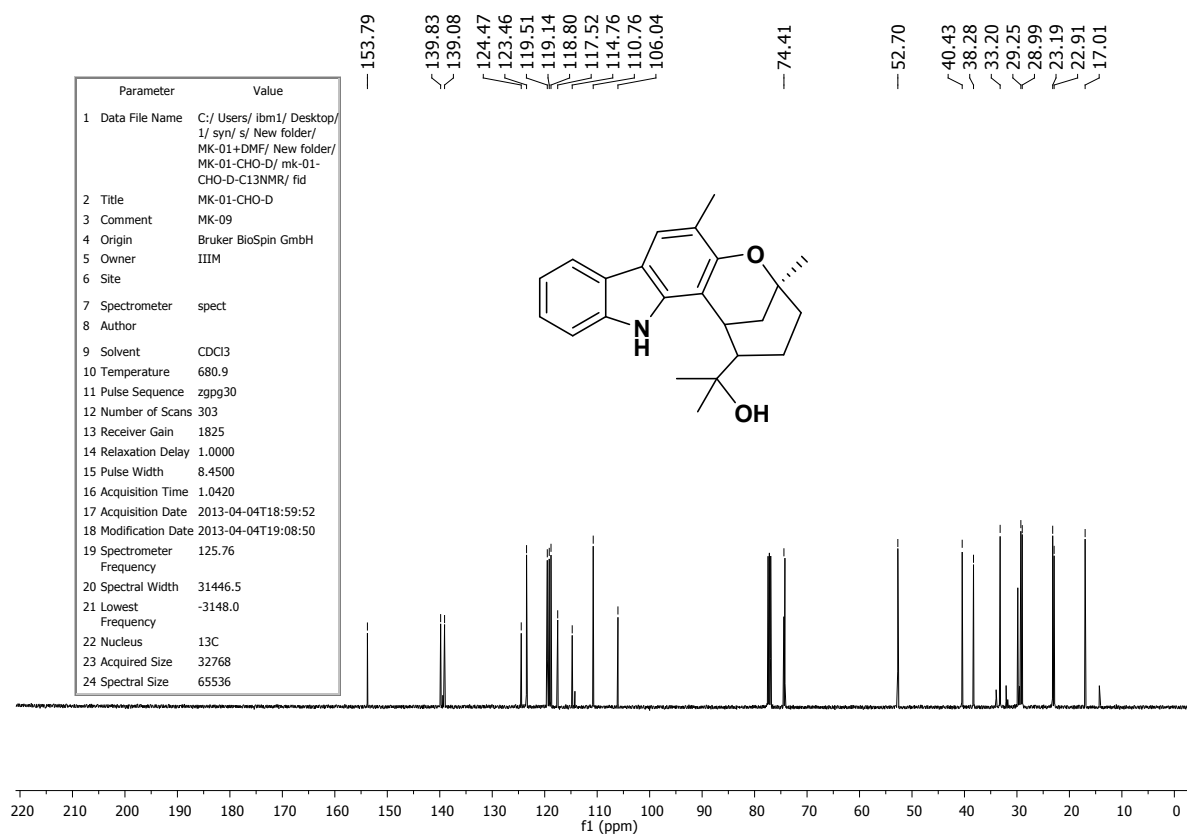

Supplement: c6ra16531a1.pdf [file c6ra16531a1.pdf]
